# Supplementary material for: Physical Activity and Incident Depression: A Meta-Analysis of Prospective Cohort Studies
Source: Atypon-hosted journal article supplement (doi:10.1176/appi.ajp.2018.17111194), 2018-04-25
Supplement: appi.ajp.2018.17111194.ds001.pdf [file appi.ajp.2018.17111194.ds001.pdf]

## Search Strategy

### PubMed/MEDLINE from inception up to October 18<sup>th</sup>, 2017

((Physical activity[MESH] OR exercise OR sports OR leisure time) AND (Depression[MESH] OR Major depressive disorder[MESH] OR depressive disorder)) AND ((association OR follow-up OR risk factor OR protect\* OR prevent\* OR causal\* OR onset) OR (("Prospective Studies"[Mesh]) OR "Cohort Studies"[Mesh]) OR "Longitudinal Studies"[Mesh]))

Number of retrieved references=3371

### SPORTDiscus from inception up to October 18<sup>th</sup>, 2017

(physical activity or exercise or leisure time or sport\*) AND (depress\* or depression or major depression or major depressive disorder or depressive disorder) AND (prospective or longitudinal or cohort or association or risk or risk factor or protect\* or prevent\* or follow-up or onset)

Number of retrieved references=1590.

### EMBASE from inception up to October 18<sup>th</sup>, 2017

Search #1: (depress\$ or major depression or major depressive disorder or depressive disorder or unipolar depression).ti,ab

Search#2: (physical activity or exercise or leisure time or sport\$).ti,ab

Search#3: (prospective or follow-up or cohort or longitudinal or risk factor or prevent\$ or protect\$).ti,ab

Search#4: #1 and #2 and #3 and #4

Number of retrieved references=6919

## PsycINFO from inception to October 18<sup>th</sup>, 2017

Search #1: (depress\$ or major depression or major depressive disorder or depressive disorder or unipolar depression).ti,ab

Search#2: (physical activity or exercise or leisure time or sport\$).ti,ab

Search#3: (prospective or follow-up or cohort or longitudinal or risk factor or prevent\$ or protect\$).ti,ab

Search#4: #1 and #2 and #3

Number of retrieved references=1594

### Studies excluded in the full-text stage and reasons (items 1-12) and studies included in the meta-analyses (item 13)

#### 1) Cross-sectional studies:

- Arredondo, E. M., Mendelson, T., Elder, J. P., Marshall, S. J., La Flair, L., & Ayala, G. X. (2012). The relation of medical conditions to depressive symptoms among Latinos: leisure time physical activity as a mediator. *J Health Psychol, 17*(5), 742-752. doi:10.1177/1359105311424468
- Babiss, L. A., & Gangwisch, J. E. (2009). Sports participation as a protective factor against depression and suicidal ideation in adolescents as mediated by self-esteem and social support. *J Dev Behav Pediatr, 30*(5), 376-384. doi:10.1097/DBP.0b013e3181b33659
- Birch, K., Ten Hope, M., Malek-Ahmadi, M., O'Connor, K., Schofield, S., Coon, D., & Nieri, W. (2016). Cognitive Function as a Mediator in the Relationship Between Physical Activity and Depression Status in Older Adults. *J Korean Med Sci, 24*(4), 540-546. doi:10.3346/jkms.2016.31.4.604
- Cao, H., Qian, Q., Weng, T., Yuan, C., Sun, Y., Wang, H., & Tao, F. (2011). Screen time, physical activity and mental health among urban adolescents in China. *Prev Med, 53*(4-5), 316-320. doi:10.1016/j.ypmed.2011.09.002
- Cha, E., Braxter, B. J., Kim, K. H., Lee, H., Akazawa, M. K., Talman, M. S., . . . Faulkner, M. S. (2015). Preventive strategies to reduce depressive symptoms in overweight and obese young adults. *Arch Psychiatr Nurs, 29*(5), 258-264. doi:10.1016/j.apnu.2015.04.002
- Chen, L. J., Stevinson, C., Ku, P. W., Chang, Y. K., & Chu, D. C. (2012). Relationships of leisure-time and non-leisure-time physical activity with depressive symptoms: a population-based study of Taiwanese older adults. *Int J Behav Nutr Phys Act, 9*, 28. doi:10.1186/1479-5868-9-28
- Davidson, C. L., Babson, K. A., Bonn-Miller, M. O., Souter, T., & Vannoy, S. (2013). The impact of exercise on suicide risk: examining pathways through depression, PTSD, and sleep in an inpatient sample of veterans. *Suicide Life Threat Behav, 43*(3), 279-289.
- France, C., Lee, C., & Powers, J. (2004). Correlates of depressive symptoms in a representative sample of young Australian women. *Australian Psychologist, 39*(3), 228-237.
- Gavric, Z., Culafic, A., & Markovic, B. (2011). Correlation between phq-9 score and physical activity level, risk factors and non-communicable diseases in patients in family medicine clinic. *Central European Journal of Medicine, 6*(3), 372-377.

- Julien, D., Gauvin, L., Richard, L., Kestens, Y., & Payette, H. (2013). The role of social participation and walking in depression among older adults: results from the VoisiNuAge study. *Can J Aging, 32*(1), 1-12. doi:10.1017/s071498081300007x
- Kantomaa, M. T., Tammelin, T. H., Ebeling, H. E., & Taanila, A. M. (2008). Emotional and behavioral problems in relation to physical activity in youth. *Med Sci Sports Exerc, 40*(10), 1749-1756.
- Kim, Y. S., Park, Y. S., Allegrante, J. P., Marks, R., Ok, H., Ok Cho, K., & Garber, C. E. (2012). Relationship between physical activity and general mental health. *Prev Med, 55*(5), 458-463. doi:http://dx.doi.org/10.1016/j.yjmed.2012.08.021
- Kivela, S. L., & Pakkala, K. (1991). Relationships between health behaviour and depression in the aged. *Aging (Milano), 3*(2), 153-159.
- Konttinen, H., Silventoinen, K., Sarlio-Lahteenkorva, S., Mannisto, S., & Haukkala, A. (2010). Emotional eating and physical activity self-efficacy as pathways in the association between depressive symptoms and adiposity indicators. *Am J Clin Nutr, 92*(5), 1031-1039. doi:10.3945/ajcn.2010.29732
- Kremer, P., Elshaug, C., Leslie, E., Toumbourou, J. W., Patton, G. C., & Williams, J. (2014). Physical activity, leisure-time screen use and depression among children and young adolescents. *J Sci Med Sport, 17*(2), 183-187. doi:10.1016/j.jsams.2013.03.012
- Kuczmarski, M. F., Cremer Sees, A., Hotchkiss, L., Cotugna, N., Evans, M. K., & Zonderman, A. B. (2010). Higher Healthy Eating Index-2005 scores associated with reduced symptoms of depression in an urban population: findings from the Healthy Aging in Neighborhoods of Diversity Across the Life Span (HANDLS) study. *J Am Diet Assoc, 110*(3), 383-389. doi:10.1016/j.jada.2009.11.025
- Lopes, A. A., Lantz, B., Morgenstern, H., Wang, M., Bieber, B. A., Gillespie, B. W., . . . Pisoni, R. L. (2014). Associations of self-reported physical activity types and levels with quality of life, depression symptoms, and mortality in hemodialysis patients: the DOPPS. *Clin J Am Soc Nephrol, 9*(10), 1702-1712. doi:10.2215/cjn.12371213
- McKercher, C., Schmidt, M. D., Sanderson, K., Dwyer, T., & Venn, A. J. (2012). Physical activity and depressed mood in primary and secondary school-children. *Ment Health Phys Act, 5*(1), 50-56.
- Sieverdes, J. C., Ray, B. M., Sui, X., Lee, D.-C., Hand, G. A., Baruth, M., & Blair, S. N. (2012). Association between Leisure Time Physical Activity and Depressive Symptoms in Men. *Medicine & Science in Sports & Exercise, 44*(2), 260-265.
- Stone, R. C., Meisner, B. A., & Baker, J. (2012). Mood disorders among older adults participating in individual and group active environments: Me versus us, or both? *Journal of Aging Research, 2012* (no pagination)(727983).
- Suija, K., Timonen, M., Suviola, M., Jokelainen, J., Jarvelin, M. R., & Tammelin, T. (2013). The association between physical fitness and depressive symptoms among young adults: results of the Northern Finland 1966 birth cohort study. *BMC Public Health, 13*, 535. doi:10.1186/1471-2458-13-535
- Taliaferro, L. A., Rienzo, B. A., Pigg, R. M., Jr., Miller, M. D., & Dodd, V. J. (2009). Associations between physical activity and reduced rates of hopelessness, depression, and suicidal behavior among college students. *J Am Coll Health, 57*(4), 427-436. doi:10.3200/jach.57.4.427-436
- Tawashy, A. E., Eng, J. J., Lin, K. H., Tang, P. F., & Hung, C. (2009). Physical activity is related to lower levels of pain, fatigue and depression in individuals with spinal-cord injury: a correlational study. *Spinal Cord, 47*(4), 301-306.
- Teychenne, M., Ball, K., & Salmon, J. (2010). Physical activity, sedentary behavior and depression among disadvantaged women. *Health Educ Res, 25*(4), 632-644. doi:10.1093/her/cyq008
- Teychenne, M., Ball, K., & Salmon, J. (2012). Educational inequalities in women's depressive symptoms: the mediating role of perceived neighbourhood characteristics. *Int J Environ Res Public Health, 9*(12), 4241-4253.

- Tolea, M., Terracciano, A., Milaneschi, Y., Metter, E., & Ferrucci, L. (2012). Personality Typology in Relation to Muscle Strength. *Int J Behav Med*, 19(3), 382-390.
- Tolea, M. I., Costa, P. T., Terracciano, A., Griswold, M., Simonsick, E. M., Najjar, S. S., . . . Ferrucci, L. (2010). Sex-specific correlates of walking speed in a wide age-ranged population. *J Gerontol B Psychol Sci Soc Sci*, 65b(2), 174-184. doi:10.1093/geronb/gbp130
- Tolmunen, T., Laukkanen, J. A., Hintikka, J., Kurl, S., Viinamaki, H., Salonen, R., . . . Salonen, J. T. (2006). Low maximal oxygen uptake is associated with elevated depressive symptoms in middle-aged men. *Eur J Epidemiol*, 21(9), 701-706. doi:10.1007/s10654-006-9038-5
- Tomson, L. M., Pangrazi, R. P., Friedman, G., & Hutchison, N. (2003). Childhood Depressive Symptoms, Physical Activity and Health Related Fitness. *J Sport Exerc Psychol*, 25(4), 419-439.
- Torres, E. R., Sampsel, C. M., Ronis, D. L., Neighbors, H. W., & Gretebeck, K. A. (2013). Leisure-time physical activity in relation to depressive symptoms in African-Americans: Results from the National Survey of American Life. *Prev Med*, 56(6), 410-412. doi:https://doi.org/10.1016/j.ypmed.2013.02.013
- Tortolero, S. R., Peskin, M. F., Baumler, E. R., Cuccaro, P. M., Elliott, M. N., Davies, S. L., . . . Schuster, M. A. (2014). Daily violent video game playing and depression in preadolescent youth. *Cyberpsychol Behav Soc Netw*, 17(9), 609-615. doi:10.1089/cyber.2014.0091

## 2) Depression established by use of antidepressants:

- Anagnostopoulos, A., Ledergerber, B., Jaccard, R., Shaw, S. A., Stoeckle, M., Bernasconi, E., . . . Weber, R. (2015). Frequency of and risk factors for depression among participants in the swiss HIV Cohort Study (SHCS). *PLoS ONE*, 10 (10) (no pagination)(e0140943)
- Jin-Won, N. O. H., Sang Ah, L. E. E., Hyo Jin, C., Jin Hyuk, H., Min Hee, K. I. M., & Young Dae, K. (2015). Relationship between the intensity of physical activity and depressive symptoms among Korean adults: analysis of Korea Health Panel data. *Journal of Physical Therapy Science*, 27(4), 1233-1237

## 3) Included people with depression at baseline:

- Alomar, M. J. (2015). Factors affecting postpartum depression among women of the UAE and OMAN. *International Journal of Pharmacy and Pharmaceutical Sciences*, 7(7), 231-233
- Angst, J., Gamma, A., Gastpar, M., Lepine, J. P., Mendlewicz, J., & Tylee, A. (2002). Gender differences in depression. Epidemiological findings from the European DEPRES I and II studies. *Eur Arch Psychiatry Clin Neurosci*, 252(5), 201-209. doi: 10.1007/s00406-002-0381-6
- Artaud, F., Dugravot, A., Sabia, S., Singh-Manoux, A., Tzourio, C., & Elbaz, A. (2013). Unhealthy behaviours and disability in older adults: Three-City Dijon cohort study. *BMJ (Online)*, 347 (7922) (no pagination)(f4240)
- Backmand, H., Kaprio, J., Kujala, U., & Sarna, S. (2003). Influence of physical activity on depression and anxiety of former elite athletes. *Int J Sports Med*, 24(8), 609-619. doi: 10.1055/s-2003-43271
- Ball, K., Burton, N. W., & Brown, W. J. (2009). A Prospective Study of Overweight, Physical Activity, and Depressive Symptoms in Young Women. *Obesity (19307381)*, 17(1), 66-71
- Beesley, V. L., Price, M. A., Butow, P. N., Green, A. C., Olsen, C. M., & Webb, P. M. (2011). Physical activity in women with ovarian cancer and its association with decreased distress and improved quality of life. *Psychooncology*, 20(11), 1161-1169. doi: 10.1002/pon.1834

- Bernaards, C. M., Jans, M. P., van den Heuvel, S. G., Hendriksen, I. J., Houtman, I. L., & Bongers, P. M. (2006). Can strenuous leisure time physical activity prevent psychological complaints in a working population? *Occup Environ Med*, *63*(1), 10-16. doi: 10.1136/oem.2004.017541
- Bhui, K., & Fletcher, A. (2000). Common mood and anxiety states: gender differences in the protective effect of physical activity. *Soc Psychiatry Psychiatr Epidemiol*, *35*(1), 28-35
- Birkeland, M. S., Torsheim, T., & Wold, B. (2009). A longitudinal study of the relationship between leisure-time physical activity and depressed mood among adolescents. *Psychology of Sport & Exercise*, *10*(1), 25-34
- Blashill, A. J., Mayer, K. H., Crane, H., Magidson, J. F., Grasso, C., Mathews, W. C., . . . Safren, S. A. (2013). Physical activity and health outcomes among HIV-infected men who have sex with men: a longitudinal mediational analysis. *Annals of behavioral medicine : a publication of the Society of Behavioral Medicine*, *46*(2), 149-156
- Boschloo, L., Reeuwijk, K. G., Schoevers, R. A., & Penninx, B. W. J. H. (2014). The impact of lifestyle factors on the 2-year course of depressive and/or anxiety disorders. *Journal of Affective Disorders*, *159*, 73-79
- Boyes, A. W., Girgis, A., D'Este, C. A., Zucca, A. C., Lecathelinais, C., & Carey, M. L. (2013). Prevalence and predictors of the short-term trajectory of anxiety and depression in the first year after a cancer diagnosis: a population-based longitudinal study. *Journal of clinical oncology : official journal of the American Society of Clinical Oncology*, *31*(21), 2724-2729
- Brown, R. F., Valpiani, E. M., Tennant, C. C., Dunn, S. M., Sharrock, M., Hodgkinson, S., & Pollard, J. D. (2009). Longitudinal assessment of anxiety, depression, and fatigue in people with multiple sclerosis. *Psychol Psychother*, *82*(Pt 1), 41-56. doi: 10.1348/147608308x345614
- Brown, W. J., Ford, J. H., Burton, N. W., Marshall, A. L., & Dobson, A. J. (2005). Prospective study of physical activity and depressive symptoms in middle-aged women. *Am J Prev Med*, *29*(4), 265-272. doi: 10.1016/j.amepre.2005.06.009
- Brummett, B. H., Babyak, M. A., Siegler, I. C., Mark, D. B., Williams, R. B., & Barefoot, J. C. (2003). Effect of smoking and sedentary behavior on the association between depressive symptoms and mortality from coronary heart disease. *Am J Cardiol*, *92*(5), 529-532
- Carroll, D. D., Blanck, H. M., Serdula, M. K., & Brown, D. R. (2010). Obesity, physical activity, and depressive symptoms in a cohort of adults aged 51 to 61. *Journal of aging and health*, *22*(3), 384-398
- Chang, H. H., & Yen, S. T. (2012). Association between obesity and depression: evidence from a longitudinal sample of the elderly in Taiwan. *Aging Ment Health*, *16*(2), 173-180. doi: 10.1080/13607863.2011.605053
- Chang, Y. C., Lu, M. C., Hu, I. H., Wu, W. C. I., & Hu, S. C. (2017). Effects of different amounts of exercise on preventing depressive symptoms in community-dwelling older adults: A prospective cohort study in Taiwan. *BMJ Open*, *7* (4) (no pagination)(e014256)
- Colman, I., Zeng, Y., McMartin, S. E., Naicker, K., Atallahjan, A., Weeks, M., . . . Galambos, N. L. (2014). Protective factors against depression during the transition from adolescence to adulthood: Findings from a national Canadian cohort. *Preventive Medicine*, *65*, 28-32
- De Moor, M. H. M., Boomsma, D. I., Stubbe, J. H., Willemsen, G., & De Geus, E. J. C. (2008). Testing causality in the association between regular exercise and symptoms of anxiety and depression. *Archives of General Psychiatry*, *65*(8), 897-905
- Demissie, Z., Siega-Riz, A. M., Evenson, K. R., Herring, A. H., Dole, N., & Gaynes, B. N. (2011). Associations between physical activity and postpartum depressive symptoms. *J Womens Health (Larchmt)*, *20*(7), 1025-1034. doi: 10.1089/jwh.2010.2091
- Dong, C., Sanchez, L. E., & Price, R. A. (2004). Relationship of obesity to depression: a family-based study. *Int J Obes Relat Metab Disord*, *28*(6), 790-795. doi: 10.1038/sj.ijo.0802626

- Dugan, S. A., Bromberger, J. T., Segawa, E., Avery, E., & Sternfeld, B. (2015). Association between physical activity and depressive symptoms: midlife women in SWAN. *Med Sci Sports Exerc*, *47*(2), 335-342. doi: 10.1249/mss.0000000000000407
- Ensari, I., Motl, R. W., McAuley, E., Mullen, S. P., & Feinstein, A. (2014). Patterns and predictors of naturally occurring change in depressive symptoms over a 30-month period in multiple sclerosis. *Mult Scler*, *20*(5), 602-609. doi: 10.1177/1352458513504251
- Gudmundsson, P., Lindwall, M., Gustafson, D. R., Ostling, S., Hallstrom, T., Waern, M., & Skoog, I. (2015). Longitudinal associations between physical activity and depression scores in Swedish women followed 32 years. *Acta Psychiatrica Scandinavica*, *132*(6), 451-458
- Heesch, K., Van Gellecum, Y., Van Uffelen, J., Burton, N., & Brown, W. (2014). Relationships between physical activity, walking and health-related quality of life in women with depressive symptoms. *Journal of Science and Medicine in Sport*, *18*, e151
- Heesch, K. C., Van Gellecum, Y. R., Burton, N. W., Van Uffelen, J. G. Z., & Brown, W. J. (2015). Physical activity, walking, and quality of life in women with depressive symptoms. *American Journal of Preventive Medicine*, *48*(3), 281-291
- Helgadottir, B., Ekblom, O., & Forsell, Y. (2014). Impact of expectations on the effects of exercise on psychological distress. *Am J Health Behav*, *38*(5), 650-656. doi: 10.5993/ajhb.38.5.2
- Hiles, S. A., Lamers, F., Milaneschi, Y., & Penninx, B. (2017). Sit, step, sweat: longitudinal associations between physical activity patterns, anxiety and depression. *Psychol Med*, *47*(8), 1466-1477. doi: 10.1017/s0033291716003548
- Hoare, E., Millar, L., Fuller-Tyszkiewicz, M., Skouteris, H., Nichols, M., Malakellis, M., . . . Allender, S. (2016). Depressive symptomatology, weight status and obesogenic risk among Australian adolescents: a prospective cohort study. *Eur Arch Psychiatry Clin Neurosci*, *6*(3), e010072. doi: 10.1007/s00406-016-0685-6
- 10.1136/bmjopen-2015-010072
- Hoegh Poulsen, P., Biering, K., & Andersen, J. H. (2016). The association between leisure time physical activity in adolescence and poor mental health in early adulthood: a prospective cohort study. *BMC Public Health*, *16*, 3. doi: 10.1186/s12889-015-2658-5
- Howie, E. K., McVeigh, J. A., Smith, A. J., & Straker, L. M. (2016). Organized Sport Trajectories from Childhood to Adolescence and Health Associations. *Medicine & Science in Sports & Exercise*, *48*(7), 1331-1339
- Isaac, V., Stewart, R., Artero, S., Ancelin, M. L., & Ritchie, K. (2009). Social activity and improvement in depressive symptoms in older people: a prospective community cohort study. *Am J Geriatr Psychiatry*, *17*(8), 688-696. doi: 10.1097/JGP.0b013e3181a88441
- Ivanova, E., Burns, R. J., Deschenes, S. S., Knauper, B., & Schmitz, N. (2017). A Longitudinal Investigation of Anxiety and Depressive Symptomatology and Exercise Behaviour Among Adults With Type 2 Diabetes Mellitus. *J Korean Med Sci*, *41*(1), 73-81. doi: 10.3346/jkms.2016.31.11.1689
- 10.1016/j.jcjd.2016.07.006
- Julien, D., Gauvin, L., Richard, L., Kestens, Y., & Payette, H. (2013). Longitudinal associations between walking frequency and depressive symptoms in older adults: results from the VoisiNuAge study. *J Am Geriatr Soc*, *61*(12), 2072-2078. doi: 10.1111/jgs.12546
- Khalaila, R., & Litwin, H. (2014). Changes in health behaviors and their associations with depressive symptoms among Israelis aged 50+. *Journal of aging and health*, *26*(3), 401-421
- Ku, P. W., Steptoe, A., & Chen, L. J. (2017). Prospective associations of exercise and depressive symptoms in older adults: the role of apolipoprotein E4. *Quality of Life Research*, 1-10

- Ku, P. W., Steptoe, A., Liao, Y., Sun, W. J., & Chen, L. J. (2017). Prospective relationship between objectively measured light physical activity and depressive symptoms in later life. *International Journal of Geriatric Psychiatry*.
- Lampinen, P., Heikkinen, R. L., & Ruoppila, I. (2000). Changes in intensity of physical exercise as predictors of depressive symptoms among older adults: an eight-year follow-up. *Prev Med*, 30(5), 371-380. doi: 10.1006/pmed.2000.0641
- McKercher, C., Patton, G. C., Schmidt, M. D., Venn, A. J., Dwyer, T., & Sanderson, K. (2013). Physical activity and depression symptom profiles in young men and women with major depression. *Psychosom Med*, 75(4), 366-374. doi: 10.1097/PSY.0b013e31828c4d53
- Moore, K. A., Babyak, M. A., Wood, C. E., Napolitano, M. A., Khatri, P., Craighead, W. E., . . . Blumenthal, J. A. (1999). The Association Between Physical Activity and Depression in Older Depressed Adults. *Journal of Aging & Physical Activity*, 7(1), 55
- Morgan, K., & Bath, P. A. (1998). Customary physical activity and psychological wellbeing: a longitudinal study. *Age Ageing*, 27 Suppl 3, 35-40
- Patten, C. A., Choi, W. S., Vickers, K. S., & Pierce, J. P. (2001). Persistence of depressive symptoms in adolescents. *Neuropsychopharmacology*, 25(5 Suppl), S89-91. doi: 10.1016/s0893-133x(01)00323-2
- Pavey, T. G., Peeters, G., Bauman, A. E., & Brown, W. J. (2013). Does vigorous physical activity provide additional benefits beyond those of moderate? *Med Sci Sports Exerc*, 45(10), 1948-1955. doi: 10.1249/MSS.0b013e3182940b91
- Pinto Pereira, S. M., Geoffroy, M. C., & Power, C. (2014). Depressive symptoms and physical activity during 3 decades in adult life bidirectional associations in a prospective cohort study. *JAMA Psychiatry*, 71(12), 1373-1380
- Rhebergen, D., Batelaan, N. M., de Graaf, R., Nolen, W. A., Spijker, J., Beekman, A. T., & Penninx, B. W. (2011). The 7-year course of depression and anxiety in the general population. *Acta Psychiatr Scand*, 123(4), 297-306. doi: 10.1111/j.1600-0447.2011.01677.x
- Ribeiro, S. M. L., Malmstrom, T. K., Morley, J. E., & Miller, D. K. (2017). Fruit and vegetable intake, physical activity, and depressive symptoms in the African American Health (AAH) study. *J Affect Disord*, 220, 31-37. doi: 10.1016/j.jad.2017.05.038
- Roberts, R. E., & Duong, H. T. (2015). Does major depression affect risk for adolescent obesity? *Journal of Affective Disorders*, 186, 162-167
- Rottenberg, J., Yaroslavsky, I., Carney, R. M., Freedland, K. E., George, C. J., Bajji, I., . . . Kovacs, M. (2014). The association between major depressive disorder in childhood and risk factors for cardiovascular disease in adolescence. *Psychosom Med*, 76(2), 122-127. doi: 10.1097/psy.0000000000000028
- Schaakxs, R., Comijs, H. C., van der Mast, R. C., Schoevers, R. A., Beekman, A. T. F., & Penninx, B. W. J. H. (2017). Risk Factors for Depression: Differential Across Age? *The American Journal of Geriatric Psychiatry*, 25(9), 966-977. doi: <https://doi.org/10.1016/j.jagp.2017.04.004>
- Steinmo, S., Hagger-Johnson, G., & Shahab, L. (2014). Bidirectional association between mental health and physical activity in older adults: Whitehall II prospective cohort study. *Preventive Medicine*, 66, 74-79. doi: <http://dx.doi.org/10.1016/j.ypmed.2014.06.005>
- Strom, M., Mortensen, E. L., Halldorson, T. I., Osterdal, M. L., & Olsen, S. F. (2009). Leisure-time physical activity in pregnancy and risk of postpartum depression: a prospective study in a large national birth cohort. *J Clin Psychiatry*, 70(12), 1707-1714. doi: 10.4088/JCP.09m05012blu
- Suetani, S., Mamun, A., Williams, G. M., Najman, J. M., McGrath, J. J., & Scott, J. G. (2017). Longitudinal association between physical activity engagement during adolescence and mental health outcomes in young adults: A 21-year birth cohort study. *Journal of Psychiatric Research*, 94, 116-123. doi: <https://doi.org/10.1016/j.jpsyres.2017.06.013>

- Sund, A. M., Larsson, B., & Wichstrom, L. (2011). Role of physical and sedentary activities in the development of depressive symptoms in early adolescence. *Soc Psychiatry Psychiatr Epidemiol*, 46(5), 431-441. doi: 10.1007/s00127-010-0208-0
- Sylvester, B. D., Ahmed, R., Amireault, S., & Sabiston, C. M. (2017). Changes in light-, moderate-, and vigorous-intensity physical activity and changes in depressive symptoms in breast cancer survivors: a prospective observational study. *Supportive Care in Cancer*, 25(11), 3305-3312. doi: 10.1007/s00520-017-3745-1
- Toseeb, U., Brage, S., Corder, K., Dunn, V. J., Jones, P. B., Owens, M., . . . Goodyer, I. M. (2014). Exercise and depressive symptoms in adolescents: A longitudinal cohort study. *JAMA Pediatrics*, 168(12), 1093-1100
- van Gool, C. H., Kempen, G. I., Bosma, H., van Boxtel, M. P., Jolles, J., & van Eijk, J. T. (2007). Associations between lifestyle and depressed mood: longitudinal results from the Maastricht Aging Study. *Am J Public Health*, 97(5), 887-894. doi: 10.2105/ajph.2004.053199
- Van Reedt Dortland, A. K. B., Vreeburg, S. A., Giltay, E. J., Licht, C. M. M., Vogelzangs, N., Van Veen, T., . . . Zitman, F. G. (2013). The impact of stress systems and lifestyle on dyslipidemia and obesity in anxiety and depression. *Psychoneuroendocrinology*, 38(2), 209-218
- Van Uffelen, J. G. Z., Van Gellecum, Y. R., Burton, N. W., Peeters, G., Heesch, K. C., & Brown, W. J. (2013). Sitting-time, physical activity, and depressive symptoms in mid-aged women. *American Journal of Preventive Medicine*, 45(3), 276-281
- Wassink-Vossen, S., Noorthoorn, E. O., Collard, R. M., Comijs, H. C., Voshaar, R. C., & Naarding, P. (2016). Value of physical activity and sedentary behavior in predicting depression in older adults. *Journal of the American Geriatrics Society*, 64(3), 647-649
- Wyshak, G. (2001). Women's college physical activity and self-reports of physician-diagnosed depression and of current symptoms of psychiatric distress. *J Womens Health Gend Based Med*, 10(4), 363-370. doi: 10.1089/152460901750269689

#### 4) Have less than 1 year of follow-up:

- Downs, D. S., DiNallo, J. M., & Kirner, T. L. (2008). Determinants of pregnancy and postpartum depression: prospective influences of depressive symptoms, body image satisfaction, and exercise behavior. *Ann Behav Med*, 36(1), 54-63. doi: 10.1007/s12160-008-9044-9
- Giurgescu, C., Zenk, S. N., Templin, T. N., Engeland, C. G., Dancy, B. L., Park, C. G., . . . Misra, D. P. (2015). The Impact of Neighborhood Environment, Social Support, and Avoidance Coping on Depressive Symptoms of Pregnant African-American Women. *Womens Health Issues*, 25(3), 294-302. doi: 10.1016/j.whi.2015.02.001
- Haas, P., Schmid, J., Stadler, G., Reuter, M., & Gawrilow, C. (2017). Zooming into daily life: within-person associations between physical activity and affect in young adults. *Psychology & Health*, 32(5), 588-604
- Langguth, N., Schmid, J., Gawrilow, C., & Stadler, G. (2016). Within-Person Link between Depressed Affect and Moderate-to-Vigorous Physical Activity in Adolescence: An Intensive Longitudinal Approach. *Appl Psychol Health Well Being*, 8(1), 44-63. doi: 10.1111/aphw.12061
- Neumark-Sztainer, D., Story, M., Hannan, P. J., Sharp, T., & Rex, J. (2003). Factors associated with changes in physical activity: A cohort study of inactive adolescent girls. *Archives of Pediatrics and Adolescent Medicine*, 157(8), 803-810
- Padmapriya, N., Bernard, J. Y., Liang, S., Loy, S. L., Shen, Z., Kwek, K., . . . Muller-Riemenschneider, F. (2016). Association of physical activity and sedentary behavior with depression and anxiety



- symptoms during pregnancy in a multiethnic cohort of Asian women. *Archives of Women's Mental Health*, 19(6), 1119-1128
- Palakodeti, S., Uratsu, C. S., Schmittiel, J. A., & Grant, R. W. (2015). Changes in physical activity among adults with diabetes: A longitudinal cohort study of inactive patients with Type 2 diabetes who become physically active. *Diabetic Medicine*, 32(8), 1051-1057
- Pischke, C. R., Frenda, S., Ornish, D., & Weidner, G. (2010). Lifestyle changes are related to reductions in depression in persons with elevated coronary risk factors. *Psychol Health*, 25(9), 1077-1100. doi: 10.1080/08870440903002986
- Trinh, L., Amireault, S., Lacombe, J., & Sabiston, C. M. (2015). Physical and psychological health among breast cancer survivors: Interactions with sedentary behavior and physical activity. *Psycho-Oncology*, 24(10), 1279-1285
- Wang, Y., & Yang, M. (2013). Crisis-induced depression, physical activity and dietary intake among young adults: evidence from the 9/11 terrorist attacks. *Econ Hum Biol*, 11(2), 206-220. doi: 10.1016/j.ehb.2012.08.001
- Wichers, M., Peeters, F., Rutten, B. P. F., Jacobs, N., Derom, C., Thiery, E., . . . van Os, J. (2012). A time-lagged momentary assessment study on daily life physical activity and affect. *Health Psychology*, 31(2), 135-144

##### 5) Have not evaluated depression as outcome:

- Atlantis, E., Shi, Z., Penninx, B. J., Wittert, G. A., Taylor, A., & Almeida, O. P. (2012). Chronic medical conditions mediate the association between depression and cardiovascular disease mortality. *Soc Psychiatry Psychiatr Epidemiol*, 47(4), 615-625. doi: 10.1007/s00127-011-0365-9
- Backmand, H., Kaprio, J., Kujala, U. M., Sarna, S., & Fogelholm, M. (2006). Physical and psychological functioning of daily living in relation to physical activity. A longitudinal study among former elite male athletes and controls. *Aging - Clinical and Experimental Research*, 18(1), 40-49
- Backmand, H. M., Kaprio, J., Kujala, U. M., & Sarna, S. (2009). Physical activity, mood and the functioning of daily living A longitudinal study among former elite athletes and referents in middle and old age. *Arch Gerontol Geriatr*, 48(1), 1-9. doi: 10.1016/j.archger.2007.09.002
- Boots, E. A., Schultz, S. A., Oh, J. M., Larson, J., Edwards, D., Cook, D., . . . Okonkwo, O. C. (2015). Cardiorespiratory fitness is associated with brain structure, cognition, and mood in a middle-aged cohort at risk for Alzheimer's disease. *Brain Imaging and Behavior*, 9(3), 639-649
- Bowen, R., Balbuena, L., Baetz, M., & Schwartz, L. (2013). Maintaining sleep and physical activity alleviate mood instability. *Prev Med*, 57(5), 461-465. doi: 10.1016/j.ypmed.2013.06.025
- Brumpton, B., Langhammer, A., Romundstad, P., Chen, Y., & Mai, X. M. (2013). The associations of anxiety and depression symptoms with weight change and incident obesity: The HUNT Study. *International Journal of Obesity*, 37(9), 1268-1274
- Brunes, A., Gudmundsdottir, S. L., & Augestad, L. B. (2015). Gender-specific associations between leisure-time physical activity and symptoms of anxiety: the HUNT study. *Social psychiatry and psychiatric epidemiology*, 50(3), 419-427
- Brunet, J., Amireault, S., Chaiton, M., & Sabiston, C. M. (2014). Identification and prediction of physical activity trajectories in women treated for breast cancer. *Annals of Epidemiology*, 24(11), 837-842
- Brunet, J., Sabiston, C. M., Chaiton, M., Barnett, T. A., O'Loughlin, E., Low, N. C. P., & O'Loughlin, J. L. (2013). The association between past and current physical activity and depressive symptoms in young adults: A 10-year prospective study. *Annals of Epidemiology*, 23(1), 25-30

- Byers, A. L., Vittinghoff, E., Lui, L. Y., Hoang, T., Blazer, D. G., Covinsky, K. E., . . . Yaffe, K. (2012). Twenty-year depressive trajectories among older women. *Archives of General Psychiatry, 69*(10), 1073-1079
- Cairney, J., Faulkner, G., Veldhuizen, S., & Wade, T. J. (2009). Changes over time in physical activity and psychological distress among older adults. *Can J Psychiatry, 54*(3), 160-169
- Capella McDonnall, M. (2011). Physical Status as a Moderator of Depressive Symptoms Among Older Adults with Dual Sensory Loss. *Rehabilitation Psychology, 56*(1), 67-76
- Carter, J. D., & Assari, S. (2017). Sustained obesity and depressive symptoms over 6 years: Race by gender differences in the health and retirement Study. *Frontiers in Aging Neuroscience, 8* (JAN) (no pagination)(312)
- Carter, J. S., Dellucci, T., Turek, C., & Mir, S. (2015). Predicting Depressive Symptoms and Weight from Adolescence to Adulthood: Stressors and the Role of Protective Factors. *Journal of youth and adolescence, 44*(11), 2122-2140
- Chambers, S. K., Lynch, B. M., Aitken, J., & Baade, P. (2009). Relationship over time between psychological distress and physical activity in colorectal cancer survivors. *Journal of Clinical Oncology, 27*(10), 1600-1606
- Chang, S. L., & Tsai, A. C. (2015). Gender differences in the longitudinal associations of depressive symptoms and leisure-time physical activity with cognitive decline in  $\geq 57$  year-old Taiwanese. *Preventive Medicine, 77*, 68-73
- Chiriboga, D. E., Yunsheng, M., Wenjun, L., Olendzki, B. C., Pagoto, S. L., Merriam, P. A., . . . Ockene, I. S. (2008). Gender Differences in Predictors of Body Weight and Body Weight Change in Healthy Adults. *Obesity (19307381), 16*(1), 137-145
- Chocano-Bedoya, P., O'Reilly, E., Lucas, M., Mirzaei, F., Okereke, O., Fung, T., . . . Ascherio, A. (2012). Dietary patterns and depression in the nurses' health study. *American Journal of Epidemiology, 175*, S75
- Cohen, R., Gasca, N. C., McClelland, R. L., Alcantara, C., Jacobs, D. R., Jr., Diez Roux, A., . . . Shea, S. (2016). Effect of Physical Activity on the Relation Between Psychosocial Factors and Cardiovascular Events (from the Multi-Ethnic Study of Atherosclerosis). *Am J Cardiol, 117*(10), 1545-1551. doi: 10.1016/j.amjcard.2016.02.026
- Collishaw, S., Hammerton, G., Mahedy, L., Sellers, R., Owen, M. J., Craddock, N., . . . Thapar, A. (2016). Mental health resilience in the adolescent offspring of parents with depression: a prospective longitudinal study. *Lancet Psychiatry, 3*(1), 49-57. doi: 10.1016/s2215-0366(15)00358-2
- Connor, A. E., Baumgartner, R. N., Pinkston, C. M., Boone, S. D., & Baumgartner, K. B. (2016). Obesity, ethnicity, and quality of life among breast cancer survivors and women without breast cancer: the long-term quality of life follow-up study. *Cancer Causes and Control, 27*(1), 115-124
- Conradsson, M., Littbrand, H., Bostrom, G., Lindelof, N., Gustafson, Y., & Rosendahl, E. (2013). Is a change in functional capacity or dependency in activities of daily living associated with a change in mental health among older people living in residential care facilities? *Clin Interv Aging, 8*, 1561-1568. doi: 10.2147/cia.s53270
- Denault, A.-S., Poulin, F., & Pedersen, S. (2009). Intensity of participation in organized youth activities during the high school years: Longitudinal associations with adjustment. *Applied Developmental Science, 13*(2), 74-87
- Dergance, J. M., Mouton, C. P., Lichtenstein, M. J., & Hazuda, H. P. (2005). Potential mediators of ethnic differences in physical activity in older Mexican Americans and European Americans: results from the San Antonio Longitudinal Study of Aging. *J Am Geriatr Soc, 53*(7), 1240-1247. doi: 10.1111/j.1532-5415.2005.53363.x

- Dishman, R. K., Xuemei, S. U. I., Church, T. S., Kline, C. E., Youngstedt, S. D., & Blair, S. N. (2015). Decline in Cardiorespiratory Fitness and Odds of Incident Sleep Complaints. *Medicine & Science in Sports & Exercise*, 47(5), 960-966
- Dontje, M. L., Krijnen, W. P., de Greef, M. H. G., Peeters, G. G. M. E. E., Stolk, R. P., van der Schans, C. P., & Brown, W. J. (2016). Effect of diagnosis with a chronic disease on physical activity behavior in middle-aged women. *Preventive Medicine*, 83, 56-62
- Duenas-Espin, I., Demeyer, H., Gimeno-Santos, E., Polkey, M. I., Hopkinson, N. S., Rabinovich, R. A., . . . Garcia-Aymerich, J. (2016). Depression symptoms reduce physical activity in COPD patients: A prospective multicenter study. *International Journal of COPD*, 11(1), 1287-1295
- Duncan, S. C., Seeley, J. R., Gau, J. M., Strycker, L. A., & Farmer, R. F. (2012). A latent growth model of adolescent physical activity as a function of depressive symptoms. *Mental Health and Physical Activity*, 5(1), 57-65
- Dunlop, D. D., Song, J., Semanik, P. A., Sharma, L., Bathon, J. M., C, B. E., . . . Chang, R. W. (2014). Relation of physical activity time to incident disability in community dwelling adults with or at risk of knee arthritis: Prospective cohort study OPEN ACCESS. *BMJ (Online)*, 348 (no pagination)(g2472)
- Fauth, R. C., Roth, J. L., & Brooks-Gunn, J. (2007). Does the neighborhood context alter the link between youth's after-school time activities and developmental outcomes? A multilevel analysis. *Dev Psychol*, 43(3), 760-777. doi: 10.1037/0012-1649.43.3.760
- Flotnes, I. S., Nilsen, T. I. L., & Augestad, L. B. (2011). Norwegian adolescents, physical activity and mental health: The Young-HUNT study. *Norsk Epidemiologi*, 20(2), 153-161
- Fortes, C., Mastroeni, S., Sperati, A., Pacifici, R., Zuccaro, P., Francesco, F., . . . Ebrahim, S. (2013). Walking four times weekly for at least 15 min is associated with longevity in a cohort of very elderly people. *Maturitas*, 74(3), 246-251. doi: 10.1016/j.maturitas.2012.12.001
- Freitas, C., Deschenes, S., Au, B., Smith, K., & Schmitz, N. (2016). Risk of diabetes in older adults with co-occurring depressive symptoms and cardiometabolic abnormalities: Prospective analysis from the English Longitudinal Study of Ageing. *PLoS ONE*, 11 (5) (no pagination)(e0155741)
- Fukukawa, Y., Nakashima, C., Tsuboi, S., Kozakai, R., Doyo, W., Niino, N., . . . Shimokata, H. (2004). Age differences in the effect of physical activity on depressive symptoms. *Psychology and Aging*, 19(2), 346-351
- Fulkerson, J. A., Sherwood, N. E., Perry, C. L., Neumark-Sztainer, D., & Story, M. (2004). Depressive symptoms and adolescent eating and health behaviors: A multifaceted view in a population-based sample. *Preventive Medicine*, 38(6), 865-875
- Gallagher, D., Kiss, A., Lanctot, K., & Herrmann, N. (2016). Depressive symptoms and cognitive decline: A longitudinal analysis of potentially modifiable risk factors in community dwelling older adults. *Journal of Affective Disorders*, 190, 235-240
- Goldschmidt, A. B., Wall, M. M., Choo, T. H. J., Larson, N. I., & Neumark-Sztainer, D. (2015). Mediators involved in the relation between depressive symptoms and weight status in female adolescents and young adults. *International Journal of Obesity*, 39(6), 1027-1029
- Gore, S., Farrell, F., & Gordon, J. (2001). Sports involvement as protection against depressed mood. *Journal of Research on Adolescence: The Official Journal of the Society for Research on Adolescence*, 11(1), 119-130
- Gouttebauge, V., Jonkers, R., Moen, M., Verhagen, E., Wylleman, P., & Kerkhoffs, G. (2017). A prospective cohort study on symptoms of common mental disorders among Dutch elite athletes. *Phys Sportsmed*, 1-7. doi: 10.1080/00913847.2017.1370987
- Griffiths, A., Kouvonen, A., Pentti, J., Oksanen, T., Virtanen, M., Salo, P., . . . Vahtera, J. (2014). Association of physical activity with future mental health in older, mid-life and younger women. *European journal of public health*, 24(5), 813-818

- Griffiths, L. J., Geraci, M., Cortina-Borja, M., Sera, F., Law, C., Joshi, H., . . . Dezateux, C. (2016). Associations between children's behavioural and emotional development and objectively measured physical activity and sedentary time: Findings from the UK Millennium Cohort Study. *Longitudinal and Life Course Studies, 7*(2), 124-143. doi: 10.14301/llcs.v7i2.353
- Gubbels, J. S., Kremers, S. P., Droomers, M., Hoefnagels, C., Stronks, K., Hosman, C., & de Vries, S. (2016). The impact of greenery on physical activity and mental health of adolescent and adult residents of deprived neighborhoods: A longitudinal study. *Health & Place, 40*, 153-160
- Gudmundsdottir, S. L., Flanders, W. D., & Augestad, L. B. (2013). Physical activity and age at menopause: The Nord-Trøndelag population-based health study. *Climacteric, 16*(1), 78-87
- Gunnell, K. E., Flament, M. F., Buchholz, A., Henderson, K. A., Obeid, N., Schubert, N., & Goldfield, G. S. (2016). Examining the bidirectional relationship between physical activity, screen time, and symptoms of anxiety and depression over time during adolescence. *Preventive Medicine, 88*, 147-152
- Hamer, M., De Oliveira, C., & Demakakos, P. (2014). Non-exercise physical activity and survival: English Longitudinal Study of Ageing. *American Journal of Preventive Medicine, 47*(4), 452-460
- Hamer, M., Lavoie, K. L., & Bacon, S. L. (2014). Taking up physical activity in later life and healthy ageing: the English longitudinal study of ageing. *British Journal of Sports Medicine, 48*(3), 239-243
- Hamer, M., & Stamatakis, E. (2013). Screen-Based Sedentary Behavior, Physical Activity, and Muscle Strength in the English Longitudinal Study of Ageing. *PLoS ONE, 8* (6) (no pagination)(e66222)
- Heesch, K., Van Uffelen, J., Van Gellecum, Y., & Brown, W. (2012). Dose response relationships between physical activity, walking and health-related quality of life in mid-age and older women. *Journal of Science and Medicine in Sport, 15*, S26-S27
- Heesch, K. C., Burton, N. W., & Brown, W. J. (2011). Concurrent and prospective associations between physical activity, walking and mental health in older women. *J Epidemiol Community Health, 65*(9), 807-813. doi: 10.1136/jech.2009.103077
- Henchoz, Y., Baggio, S., N'Goran, A. A., Studer, J., Deline, S., Mohler-Kuo, M., . . . Gmel, G. (2014). Health impact of sport and exercise in emerging adult men: a prospective study. *Qual Life Res, 23*(8), 2225-2234. doi: 10.1007/s11136-014-0665-0
- Hubscher, M., Hartvigsen, J., Fernandez, M., Christensen, K., & Ferreira, P. (2016). Does physical activity moderate the relationship between depression symptomatology and low back pain? Cohort and co-twin control analyses nested in the longitudinal study of aging Danish twins (LSADT). *Eur Spine J, 25*(4), 1226-1233. doi: 10.1007/s00586-015-4138-0
- Iwasa, H., Yoshida, Y., Kai, I., Suzuki, T., Kim, H., & Yoshida, H. Leisure activities and cognitive function in elderly community-dwelling individuals in Japan: A 5-year prospective cohort study. *Journal of Psychosomatic Research.*
- Jewett, R., Sabiston, C. M., Brunet, J., O'Loughlin, E. K., Scarapicchia, T., & O'Loughlin, J. (2014). School sport participation during adolescence and mental health in early adulthood. *J Adolesc Health, 55*(5), 640-644. doi: 10.1016/j.jadohealth.2014.04.018
- Juarbe, T. C., Gutierrez, Y., Gilliss, C., & Lee, K. A. (2006). Depressive symptoms, physical activity, and weight gain in premenopausal Latina and White women. *Maturitas, 55*(2), 116-125
- Kim, E. S., Kubzansky, L. D., Soo, J., & Boehm, J. K. (2016). Maintaining healthy behavior: A prospective study of psychological well-being and physical activity. *Annals of Behavioral Medicine*(Pagination), No Pagination Specified
- Kritz-Silverstein, D., Barrett-Connor, E., & Corbeau, C. (2001). Cross-sectional and prospective study of exercise and depressed mood in the elderly : the Rancho Bernardo study. *Am J Epidemiol, 153*(6), 596-603
- Ku, P. W., Fox, K. R., Chen, L. J., & Chou, P. (2012). Physical activity and depressive symptoms in older adults: 11-year follow-up. *Am J Prev Med, 42*(4), 355-362. doi: 10.1016/j.amepre.2011.11.010

- Kwon, A. M., & Shin, C. (2016). Structural equation modelling for the effect of physical exercise on excessive daytime sleepiness. *Public Health, 141*, 95-99. doi: 10.1016/j.puhe.2016.08.024
- Lampinen, P., Heikkinen, R. L., Kauppinen, M., & Heikkinen, E. (2006). Activity as a predictor of mental well-being among older adults. *Aging Ment Health, 10*(5), 454-466. doi: 10.1080/13607860600640962
- Lankarani, M. M., & Assari, S. (2016). Baseline depressive symptoms predict subsequent heart disease; A 20-year cohort. *International Cardiovascular Research Journal, 10*(1), 29-34
- Lee, J. O., Kosterman, R., Jones, T. M., Herrenkohl, T. I., Rhew, I. C., Catalano, R. F., & Hawkins, J. D. (2016). Mechanisms linking high school graduation to health disparities in young adulthood: a longitudinal analysis of the role of health behaviours, psychosocial stressors, and health insurance. *Public Health, 139*, 61-69
- Lee, Y., & Park, K. (2008). Does physical activity moderate the association between depressive symptoms and disability in older adults? *Int J Geriatr Psychiatry, 23*(3), 249-256. doi: 10.1002/gps.1870
- Leng, C. H., & Wang, J. D. (2016). Daily home gardening improved survival for older people with mobility limitations: an 11-year follow-up study in Taiwan. *Clin Interv Aging, 11*, 947-959. doi: 10.2147/cia.s107197
- Lindwall, M., Gerber, M., Jonsdottir, I. H., Borjesson, M., & Ahlborg, G., Jr. (2014). The relationships of change in physical activity with change in depression, anxiety, and burnout: a longitudinal study of Swedish healthcare workers. *Health Psychol, 33*(11), 1309-1318. doi: 10.1037/a0034402
- Lindwall, M., Larsman, P., & Hagger, M. S. (2011). The reciprocal relationship between physical activity and depression in older European adults: a prospective cross-lagged panel design using SHARE data. *Health Psychol, 30*(4), 453-462. doi: 10.1037/a0023268
- Lindwall, M., Rennemark, M., Halling, A., Berglund, J., & Hassmén, P. (2007). Depression and Exercise in Elderly Men and Women: Findings From the Swedish National Study on Aging and Care. *Journal of Aging & Physical Activity, 15*(1), 41-55
- Mason, M. J., Schmidt, C., Abraham, A., Walker, L., & Tercyak, K. (2009). Adolescents' social environment and depression: social networks, extracurricular activity, and family relationship influences. *J Clin Psychol Med Settings, 16*(4), 346-354. doi: 10.1007/s10880-009-9169-4
- McPhie, M. L., & Rawana, J. S. (2012). Unravelling the relation between physical activity, self-esteem and depressive symptoms among early and late adolescents: A mediation analysis. *Mental Health and Physical Activity, 5*(1), 43-49
- McPhie, M. L., & Rawana, J. S. (2015). The effect of physical activity on depression in adolescence and emerging adulthood: A growth-curve analysis. *Journal of Adolescence, 40*, 83-92
- Messier, L., Elisha, B., Schmitz, N., Garipey, G., Malla, A., Lesage, A., . . . Strychar, I. (2014). Weight Cycling and Depressive Symptoms in Diabetes: A Community-Based Study of Adults with Type 2 Diabetes Mellitus in Quebec. *Canadian Journal of Diabetes, 38*(6), 456-460
- Mirza, S. S., Wolters, F. J., Swanson, S. A., Koudstaal, P. J., Hofman, A., Tiemeier, H., & Ikram, M. A. (2016). 10-year trajectories of depressive symptoms and risk of dementia: a population-based study. *The Lancet Psychiatry, 3*(7), 628-635
- Monin, J. K., Chen, B., & Stahl, S. T. (2016). Dyadic Associations Between Physical Activity and Depressive Symptoms in Older Adults with Musculoskeletal Conditions and Their Spouses. *Stress Health, 32*(3), 244-252. doi: 10.1002/smi.2603
- Monin, J. K., Levy, B., Chen, B., Fried, T., Stahl, S. T., Schulz, R., . . . Kershaw, T. (2015). Husbands' and Wives' Physical Activity and Depressive Symptoms: Longitudinal Findings from the Cardiovascular Health Study. *Annals of behavioral medicine : a publication of the Society of Behavioral Medicine, 49*(5), 704-714

- Morrison, V., Pollard, B., Johnston, M., & MacWalter, R. (2005). Anxiety and depression 3 years following stroke: demographic, clinical, and psychological predictors. *J Psychosom Res*, *59*(4), 209-213. doi: 10.1016/j.jpsychores.2005.02.019
- Motl, R. W., Birnbaum, A. S., Kubik, M. Y., & Dishman, R. K. (2004). Naturally occurring changes in physical activity are inversely related to depressive symptoms during early adolescence. *Psychosom Med*, *66*(3), 336-342
- Motl, R. W., McAuley, E., & Sandroff, B. M. (2013). Longitudinal Change in Physical Activity and Its Correlates in Relapsing-Remitting Multiple Sclerosis. *Physical Therapy*, *93*(8), 1037-1048
- Neissaar, I., & Raudsepp, L. (2011). Changes in physical activity, self-efficacy and depressive symptoms in adolescent girls. *Pediatr Exerc Sci*, *23*(3), 331-343
- Oga, T., Nishimura, K., Tsukino, M., Sato, S., Hajiro, T., & Mishima, M. (2007). Longitudinal deteriorations in patient reported outcomes in patients with COPD. *Respir Med*, *101*(1), 146-153. doi: 10.1016/j.rmed.2006.04.001
- Oh, D. J., Park, J. Y., Oh, M., Kim, K., Hong, J., Kim, T., . . . Kim, K. W. (2015). Suicidality-based prediction of suicide attempts in a community-dwelling elderly population: Results from the Osan Mental Health Survey. *Journal of Affective Disorders*, *184*, 286-292
- Olive, L., Telford, R., Byrne, D., Abhayaratna, W., & Telford, R. (2016). Psychological distress leads to reduced physical activity and fitness in children: The Australian longitudinal LOOK study. *Journal of Behavioral Medicine*, *39*(4), 587-598
- Pan, L.-Y., Hsu, H.-C., Chang, W.-C., & Luh, D.-L. (2015). Trajectories of Physical Activity and Risk Factors Among Taiwanese Older Adults. *International Journal of Behavioral Medicine*, *22*(1), 62-69
- Patten, S. B., Williams, J. V. A., Lavorato, D. H., & Eliasziw, M. (2009). A longitudinal community study of major depression and physical activity. *General Hospital Psychiatry*, *31*(6), 571-575
- Pavey, T. G., Burton, N. W., & Brown, W. J. (2015). Prospective Relationships Between Physical Activity and Optimism in Young and Mid-aged Women. *J Phys Act Health*, *12*(7), 915-923. doi: 10.1123/jpah.2014-0070
- Perrino, T., Mason, C. A., Brown, S. C., & Szapocznik, J. (2010). The relationship between depressive symptoms and walking among Hispanic older adults: a longitudinal, cross-lagged panel analysis. *Aging Ment Health*, *14*(2), 211-219. doi: 10.1080/13607860903191374
- Perron, A., Brendgen, M., Vitaro, F., Cote, S. M., Tremblay, R. E., & Boivin, M. (2012). Moderating effects of team sports participation on the link between peer victimization and mental health problems. *Mental Health and Physical Activity*, *5*(2), 107-115
- Persons, J. E., Robinson, J. G., Payne, M. E., & Fiedorowicz, J. G. (2017). Serum lipid changes following the onset of depressive symptoms in postmenopausal women. *Psychiatry Research*, *247*, 282-287
- Raudsepp, L., & Neissaar, I. (2012). Brief report: Relationships between physical activity and depressive symptoms in adolescent girls. *Journal of Adolescence*, *35*(5), 1399-1402. doi: <https://doi.org/10.1016/j.adolescence.2012.04.003>
- Rees, D. I., & Sabia, J. J. (2010). Exercise and adolescent mental health: new evidence from longitudinal data. *Journal of Mental Health Policy and Economics*, *13*(1), 13-25+45-46+49
- Rist, P. M., Marden, J. R., Capistrant, B. D., Wu, Q., & Glymour, M. M. (2015). Do physical activity, smoking, drinking, or depression modify transitions from cognitive impairment to functional disability? *Journal of Alzheimer's Disease*, *44*(4), 1171-1180
- Rommel, J., Simpson, R., Mounsey, J. P., Chung, E., Schwartz, J., Pursell, I., & Gehi, A. (2013). Effect of body mass index, physical activity, depression, and educational attainment on high-sensitivity c-reactive protein in patients with atrial fibrillation. *American Journal of Cardiology*, *111*(2), 208-212

- Ruiz-Narvaez, E. A., Palmer, J. R., Gerlovin, H., Wise, L. A., & Rosenberg, L. (2016). Depressive symptoms, weight gain and risk of obesity in U.S. black women. *Circulation. Conference: American Heart Association's Epidemiology and Prevention/Lifestyle and Cardiometabolic Health*, 133(no pagination)
- Sabiston, C. M., Jewett, R., Ashdown-Franks, G., Belanger, M., Brunet, J., O'Loughlin, E., & O'Loughlin, J. (2016). Number of Years of Team and Individual Sport Participation During Adolescence and Depressive Symptoms in Early Adulthood. *J Sport Exerc Psychol*, 38(1), 105-110. doi: 10.1123/jsep.2015-0175
- Sabiston, C. M., O'Loughlin, E., Brunet, J., Chaiton, M., Low, N. C., Barnett, T., & O'Loughlin, J. (2013). Linking depression symptom trajectories in adolescence to physical activity and team sports participation in young adults. *Prev Med*, 56(2), 95-98. doi: 10.1016/j.ypmed.2012.11.013
- Saint Onge, J. M., Krueger, P. M., & Rogers, R. G. (2014). The relationship between major depression and nonsuicide mortality for U.S. adults: the importance of health behaviors. *The journals of gerontology, Series B, Psychological sciences and social sciences*. 69(4), 622-632
- Scarapicchia, T. M., Sabiston, C. M., O'Loughlin, E., Brunet, J., Chaiton, M., & O'Loughlin, J. L. (2014). Physical activity motivation mediates the association between depression symptoms and moderate-to-vigorous physical activity. *Prev Med*, 66, 45-48. doi: 10.1016/j.ypmed.2014.05.017
- Schonberg, M. A., York, M., Basu, N., Olveczky, D., & Marcantonio, E. R. (2008). Preventive Health Care Among Older Women in an Academic Primary Care Practice. *Women's Health Issues*, 18(4), 249-256
- Sin, N. L., Yaffe, K., & M, A. W. (2015). Depressive symptoms, cardiovascular disease severity, and functional status in older adults with coronary heart disease: The heart and soul study. *Journal of the American Geriatrics Society*, 63(1), 8-15
- Stavrakakis, N., Booij, S. H., Roest, A. M., de Jonge, P., Oldehinkel, A. J., & Bos, E. H. (2015). Temporal dynamics of physical activity and affect in depressed and nondepressed individuals. *Health Psychology*, 34, 1268-1277
- Stavrakakis, N., de Jonge, P., Ormel, J., & Oldehinkel, A. J. (2012). Bidirectional prospective associations between physical activity and depressive symptoms. The TRAILS Study. *J Adolesc Health*, 50(5), 503-508. doi: 10.1016/j.jadohealth.2011.09.004
- Stavrakakis, N., Oldehinkel, A. J., Nederhof, E., Oude Voshaar, R. C., Voshaar, F. C., Ormel, J., & de Jonge, P. (2013). Plasticity genes do not modify associations between physical activity and depressive symptoms. *Health Psychology*, 32(7), 785-792
- Stephan, Y., Sutin, A. R., & Terracciano, A. (2015). "Feeling younger, walking faster": subjective age and walking speed in older adults. *Age*, 37 (5) (no pagination)(86)
- Stephens, C., Spicer, J., Budge, C., Stevenson, B., & Alpass, F. (2015). Accounting for differences in cognitive health between older adults in New Zealand and the USA. *International Psychogeriatrics*, 27(4), 591-600
- Stewart, A. L., Hays, R. D., Wells, K. B., Rogers, W. H., Spritzer, K. L., & Greenfield, S. (1994). Long-term functioning and well-being outcomes associated with physical activity and exercise in patients with chronic conditions in the medical outcomes study. *Journal of Clinical Epidemiology*, 47(7), 719-730
- Strandheim, A., Bjerkeset, O., Gunnell, D., Bjørnelv, S., Holmen, T. L., & Bentzen, N. (2014). Risk factors for suicidal thoughts in adolescence—a prospective cohort study: The Young-HUNT study. *BMJ Open*, 4(8)
- Sylvester, B. D., Ahmed, R., Amireault, S., & Sabiston, C. M. (2017). Changes in light-, moderate-, and vigorous-intensity physical activity and changes in depressive symptoms in breast cancer survivors: a prospective observational study. *Supportive Care in Cancer*, 1-8

- Taliaferro, L. A., Eisenberg, M. E., Johnson, K. E., Nelson, T. F., & Neumark-Sztainer, D. (2011). Sport participation during adolescence and suicide ideation and attempts. *Int J Adolesc Med Health, 23*(1), 3-10
- Taliaferro, L. A., Rienzo, B. A., Miller, M. D., Pigg, R. M., & Dodd, V. J. (2010). Potential mediating pathways through which sports participation relates to reduced risk of suicidal ideation. *Res Q Exerc Sport, 81*(3), 328-339. doi: 10.1080/02701367.2010.10599681
- Teychenne, M., & Hinkley, T. (2016). Associations between screen-based sedentary behaviour and anxiety symptoms in mothers with young children. *PLoS ONE, 11* (5) (no pagination)(e0155696)
- Tiggelman, D., Van De Ven, M. O. M., Van Schayck, O. C. P., & Engels, R. C. M. E. (2014). Moderating effect of gender on the prospective relation of physical activity with psychosocial outcomes and asthma control in adolescents: A longitudinal study. *Journal of Asthma, 51*(10), 1049-1054
- Toker, S., & Biron, M. (2012). Job burnout and depression: unraveling their temporal relationship and considering the role of physical activity. *The Journal of applied psychology, 97*(3), 699-710
- Tsuji, T., Sasaki, Y., Matsuyama, Y., Sato, Y., Aida, J., Kondo, K., & Kawachi, I. (2017). Reducing depressive symptoms after the Great East Japan Earthquake in older survivors through group exercise participation and regular walking: A prospective observational study. *BMJ Open, 7* (3) (no pagination)(e013706)
- Tsutsumimoto, K., Doi, T., Makizako, H., Hotta, R., Nakakubo, S., Makino, K., . . . Shimada, H. (2017). The association between anorexia of aging and physical frailty: Results from the national center for geriatrics and gerontology's study of geriatric syndromes. *Maturitas, 97*, 32-37
- Van Dijk, M. L., Savelberg, H. H., Verboon, P., Kirschner, P. A., & De Groot, R. H. (2016). Decline in physical activity during adolescence is not associated with changes in mental health. *BMC Public Health, 16*, 300. doi: 10.1186/s12889-016-2983-3
- van Gool, C. H., Kempen, G. I. J. M., Penninx, B. W. J. H., Deeg, D. J. H., Beekman, A. T. F., & van Eijk, J. T. M. (2003). Relationship between changes in depressive symptoms and unhealthy lifestyles in late middle aged and older persons: Results from the longitudinal aging study Amsterdam. *Age and Ageing, 32*(1), 81-87
- Vernon, M. M., Young-Hyman, D., & Looney, S. W. (2010). Maternal stress, physical activity, and body mass index during new mothers' first year postpartum. *Women Health, 50*(6), 544-562. doi: 10.1080/03630242.2010.516692
- von Kanel, R., Mausbach, B. T., Mills, P. J., Dimsdale, J. E., Patterson, T. L., Ancoli-Israel, S., . . . Grant, I. (2014). Longitudinal relationship of low leisure satisfaction but not depressive symptoms with systemic low-grade inflammation in dementia caregivers. *J Gerontol B Psychol Sci Soc Sci, 69*(3), 397-407. doi: 10.1093/geronb/gbt020
- Waller, K., Kaprio, J., Korhonen, T., Tuulio-Henriksson, A., & Kujala, U. (2016). Persistent leisure-time physical activity in adulthood and use of antidepressants: A follow-up study among twins. *Journal of Affective Disorders, 200*, 172-177
- Wang, C. Y., Yeh, C. J., Wang, C. W., Wang, C. F., & Lin, Y. L. (2011). The health benefits following regular ongoing exercise lifestyle in independent community-dwelling older Taiwanese adults. *Australas J Ageing, 30*(1), 22-26. doi: 10.1111/j.1741-6612.2010.00441.x
- Wang, M.-T., Chow, A., & Amemiya, J. (2017). Who wants to play? Sport motivation trajectories, sport participation, and the development of depressive symptoms. *Journal of Youth and Adolescence*(Pagination), No Pagination Specified
- Wang, S., Luo, X., Barnes, D., Sano, M., & Yaffe, K. (2014). Physical activity and risk of cognitive impairment among oldest-old women. *American Journal of Geriatric Psychiatry, 22*(11), 1149-1157
- White, D. K., Tudor-Locke, C., Zhang, Y., Niu, J., Felson, D. T., Gross, K. D., . . . Neogi, T. (2016). Prospective change in daily walking over 2 years in older adults with or at risk of knee



- osteoarthritis: the MOST study. *Osteoarthritis Cartilage*, 24(2), 246-253. doi: 10.1016/j.joca.2015.08.004
- White, J., Zaninotto, P., Walters, K., Kivimaki, M., Demakakos, P., Shankar, A., . . . Batty, G. D. (2015). Severity of depressive symptoms as a predictor of mortality: the English longitudinal study of ageing. *Psychological medicine*, 45(13), 2771-2779
- White, K., Kendrick, T., & Yardley, L. (2009). Change in self-esteem, self-efficacy and the mood dimensions of depression as potential mediators of the physical activity and depression relationship: Exploring the temporal relation of change. *Mental Health and Physical Activity*, 2(1), 44-52
- Wichstrom, L., von Soest, T., & Kvaem, I. L. (2013). Predictors of growth and decline in leisure time physical activity from adolescence to adulthood. *Health Psychol*, 32(7), 775-784. doi: 10.1037/a0029465
- Wiles, N. J., Haase, A. M., Gallacher, J., Lawlor, D. A., & Lewis, G. (2007). Physical activity and common mental disorder: results from the Caerphilly study. *Am J Epidemiol*, 165(8), 946-954. doi: 10.1093/aje/kwk070
- Wilson, K. E., Das, B. M., Evans, E. M., & Dishman, R. K. (2016). Structural Equation Modeling Supports a Moderating Role of Personality in the Relationship Between Physical Activity and Mental Health in College Women. *Journal of Physical Activity & Health*, 13(1), 67-78
- Win, S., Parakh, K., Eze-Nliam, C. M., Gottdiener, J. S., Kop, W. J., & Ziegelstein, R. C. (2011). Depressive symptoms, physical inactivity and risk of cardiovascular mortality in older adults: The Cardiovascular Health Study. *Heart*, 97(6), 500-505
- Xu, Q., Anderson, D., & Courtney, M. (2010). A longitudinal study of the relationship between lifestyle and mental health among midlife and older women in Australia: findings from the Healthy Aging of Women Study. *Health Care Women Int*, 31(12), 1082-1096. doi: 10.1080/07399332.2010.486096
- Xue, Q. L., Bandeen-Roche, K., Mielenz, T. J., Seplaki, C. L., Szanton, S. L., Thorpe, R. J., . . . Fried, L. P. (2012). Patterns of 12-year change in physical activity levels in community-dwelling older women: can modest levels of physical activity help older women live longer? *American journal of epidemiology*, 176(6), 534-543
- Yang, X., Hirvensalo, M., Hintsanen, M., Hintsanen, T., Pulkki-Raback, L., Jokela, M., . . . Raitakari, O. T. (2014). Longitudinal associations between changes in physical activity and depressive symptoms in adulthood: the young Finns study. *International journal of behavioral medicine*, 21(6), 908-917
- Yang, X., Telama, R., Hirvensalo, M., Hintsanen, M., Hintsanen, T., Pulkki-Raback, L., . . . Raitakari, O. T. (2012). Moderating effects of leisure-time physical activity on the association between job strain and depressive symptoms: the Cardiovascular Risk in Young Finns Study. *J Occup Environ Med*, 54(3), 303-309. doi: 10.1097/JOM.0b013e318240df39
- Zahl, T., Steinsbekk, S., & Wichstrom, L. (2017). Physical activity, sedentary behavior, and symptoms of major depression in middle childhood. *Pediatrics*, 139 (2) (no pagination)(e20161711)
- Zdanowicz, N., Lepiece, B., Tordeurs, D., Jacques, D., & Reynaert, C. (2011). Predictability of levels of physical and mental health: A 2 year longitudinal study. *Psychiatria Danubina*, 23(SUPPL. 1), S8-S12

## 6) Have not used PA as exposure factor:

- Aberg, M. A., Nyberg, J., Toren, K., Sorberg, A., Kuhn, H. G., & Waern, M. (2014). Cardiovascular fitness in early adulthood and future suicidal behaviour in men followed for up to 42 years. *Psychol Med*, 44(4), 779-788. doi: 10.1017/s0033291713001207
- Aberg, M. A., Waern, M., Nyberg, J., Pedersen, N. L., Bergh, Y., Aberg, N. D., . . . Toren, K. (2012). Cardiovascular fitness in males at age 18 and risk of serious depression in adulthood: Swedish prospective population-based study. *Br J Psychiatry*, 201(5), 352-359. doi: 10.1192/bjp.bp.111.103416
- Akbaraly, T. N., Sabia, S., Shipley, M. J., Batty, G. D., & Kivimaki, M. (2013). Adherence to healthy dietary guidelines and future depressive symptoms: Evidence for sex differentials in the Whitehall II study. *American Journal of Clinical Nutrition*, 97(2), 419-427
- Arredondo, E. M., Mendelson, T., Elder, J. P., Marshall, S. J., La Flair, L., & Ayala, G. X. (2012). The relation of medical conditions to depressive symptoms among Latinos: leisure time physical activity as a mediator. *J Health Psychol*, 17(5), 742-752. doi: 10.1177/1359105311424468
- Au, B., Smith, K. J., Gariépy, G., & Schmitz, N. (2015). The longitudinal associations between C-reactive protein and depressive symptoms: Evidence from the English Longitudinal Study of Ageing (ELSA). *International Journal of Geriatric Psychiatry*, 30(9), 976-984
- Barefoot, J. C., Heitmann, B. L., Helms, M. J., Williams, R. B., Surwit, R. S., & Siegler, I. C. (1998). Symptoms of depression and changes in body weight from adolescence to mid-life. *Int J Obes Relat Metab Disord*, 22(7), 688-694
- Becofsky, K. M., Sui, X., Lee, D. C., Wilcox, S., Zhang, J., & Blair, S. N. (2015). A prospective study of fitness, fatness, and depressive symptoms. *Am J Epidemiol*, 181(5), 311-320. doi: 10.1093/aje/kwu330
- Berke, E. M., Gottlieb, L. M., Moudon, A. V., & Larson, E. B. (2007). Protective association between neighborhood walkability and depression in older men. *J Am Geriatr Soc*, 55(4), 526-533. doi: 10.1111/j.1532-5415.2007.01108.x
- Bohnert, A. M., & Garber, J. (2007). Prospective relations between organized activity participation and psychopathology during adolescence. *J Abnorm Child Psychol*, 35(6), 1021-1033. doi: 10.1007/s10802-007-9152-1
- Bomba, J., & Modrzejewska, R. (2008). Prospective study on dynamics of depression in mid-adolescence. *Archives of Psychiatry and Psychotherapy*, 10(1), 29-35
- Bowes, L., Joinson, C., Wolke, D., & Lewis, G. (2016). Peer victimisation during adolescence and its impact on depression in early adulthood: prospective cohort study in the United Kingdom. *British Journal of Sports Medicine*, 50(3), 176-183
- Clark, T., Fleming, T., Bullen, P., Crengle, S., Denny, S., Dyson, B., . . . Lewycka, S. (2013). Health and well-being of secondary school students in New Zealand: Trends between 2001, 2007 and 2012. *Journal of Paediatrics and Child Health*, 49(11), 925-934
- Cohen, B. E., Martires, K. J., & Ho, R. S. (2016). Psoriasis and the risk of depression in the US population national health and nutrition examination survey 2009-2012. *JAMA Dermatology*, 152(1), 73-79
- Coleman, P., Aubin, A., Robinson, M., Ivani-Chalian, C., & Briggs, R. (1993). Predictors of depressive symptoms and low self-esteem in a follow-up study of elderly people over 10 years. *International Journal of Geriatric Psychiatry*, 8(4), 343-349
- Crowley, S. K., Wilkinson, L. L., Wigfall, L. T., Reynolds, A. M., Muraca, S. T., Glover, S. H., . . . Youngstedt, S. D. (2015). Physical Fitness and Depressive Symptoms during Army Basic Combat Training. *Medicine & Science in Sports & Exercise*, 47(1), 151-158

- Dobbels, F., De Geest, S., Martin, S., Van Cleemput, J., Droogne, W., & Vanhaecke, J. (2004). Prevalence and correlates of depression symptoms at 10 years after heart transplantation: continuous attention required. *Transpl Int*, *17*(8), 424-431. doi: 10.1007/s00147-004-0732-5
- Duivis, H. E., de Jonge, P., Penninx, B. W., Na, B. Y., Cohen, B. E., & Whooley, M. A. (2011). Depressive symptoms, health behaviors, and subsequent inflammation in patients with coronary heart disease: prospective findings from the heart and soul study. *Am J Psychiatry*, *168*(9), 913-920. doi: 10.1176/appi.ajp.2011.10081163
- Fukumori, N., Yamamoto, Y., Takegami, M., Yamazaki, S., Onishi, Y., Sekiguchi, M., . . . Fukuhara, S. (2015). Association between hand-grip strength and depressive symptoms: Locomotive Syndrome and Health Outcomes in Aizu Cohort Study (LOHAS). *Age Ageing*, *44*(4), 592-598. doi: 10.1093/ageing/afv013
- Gariepy, G., Kaufman, J. S., Blair, A., Kestens, Y., & Schmitz, N. (2015). Place and health in diabetes: The neighbourhood environment and risk of depression in adults with Type 2 diabetes. *Diabetic Medicine*, *32*(7), 944-950
- Gougeon, L., Payette, H., Morais, J., Gaudreau, P., Shatenstein, B., & Gray-Donald, K. (2014). Dietary patterns and incidence of depression in a cohort of community-dwelling older Canadians. *Journal of Nutrition, Health and Aging*, *04*
- Gougeon, L., Payette, H., Morais, J. A., Gaudreau, P., Shatenstein, B., & Gray-Donald, K. (2016). Intakes of folate, Vitamin B<sub>6</sub> and B<sub>12</sub> and risk of depression in community-dwelling older adults: The Quebec Longitudinal Study on Nutrition and Aging. *European Journal of Clinical Nutrition*, *70*(3), 380-385
- Gougeon, L., Payette, H., Morais, J. A., Gaudreau, P., Shatenstein, B., & Gray-Donald, K. (2017). A prospective evaluation of the depression-nutrient intake reverse causality hypothesis in a cohort of community-dwelling older Canadians. *British Journal of Nutrition*, *117*(7), 1032-1041
- Grontved, A., Singhammer, J., Froberg, K., Moller, N. C., Pan, A., Pfeiffer, K. A., & Kristensen, P. L. (2015). A prospective study of screen time in adolescence and depression symptoms in young adulthood. *Prev Med*, *81*, 108-113. doi: 10.1016/j.ypmed.2015.08.009
- Gubata, M. E., Urban, N., Cowan, D. N., & Niebuhr, D. W. (2013). A prospective study of physical fitness, obesity, and the subsequent risk of mental disorders among healthy young adults in army training. *Journal of Psychosomatic Research*, *75*(1), 43-48
- Hagger-Johnson, G., Hamer, M., Stamatakis, E., Bell, J. A., Shahab, L., & Batty, G. D. (2014). Association between sitting time in midlife and common mental disorder symptoms: Whitehall II prospective cohort study. *J Psychiatr Res*, *57*, 182-184. doi: 10.1016/j.jpsychires.2014.04.023
- Hamer, M., Poole, L., & Messerli-Burgy, N. (2013). Television viewing, C-reactive protein, and depressive symptoms in older adults. *Brain Behav Immun*, *33*, 29-32. doi: 10.1016/j.bbi.2013.05.001
- Hamer, M., & Stamatakis, E. (2014). Prospective study of sedentary behavior, risk of depression, and cognitive impairment. *Med Sci Sports Exerc*, *46*(4), 718-723. doi: 10.1249/mss.0000000000000156
- Harzheim, D., Klose, H., Pinado, F. P., Ehken, N., Nagel, C., Fischer, C., . . . Guth, S. (2013). Anxiety and depression disorders in patients with pulmonary arterial hypertension and chronic thromboembolic pulmonary hypertension. *Respir Res*, *14*, 104. doi: 10.1186/1465-9921-14-104
- Henderson, A., Korten, A., Jacomb, P., Mackinnon, A., Jorm, A., Christensen, H., & Rodgers, B. (1997). The course of depression in the elderly: a longitudinal community-based study in Australia. *Psychological medicine*, *27*(01), 119-129
- Hernandez, R., Kershaw, K. N., Prohaska, T. R., Wang, P. C., Marquez, D. X., & Sarkisian, C. A. (2015). The cross-sectional and longitudinal association between perceived neighborhood walkability characteristics and depressive symptoms in older Latinos: the "Caminemos!" study. *Journal of aging and health*, *27*(3), 551-568

- Hodge, A., Almeida, O. P., English, D. R., Giles, G. G., & Flicker, L. (2013). Patterns of dietary intake and psychological distress in older Australians: Benefits not just from a Mediterranean diet. *International Psychogeriatrics*, *25*(3), 456-466
- Hollenberg, M., Haight, T., & Tager, I. B. (2003). Depression decreases cardiorespiratory fitness in older women. *J Clin Epidemiol*, *56*(11), 1111-1117
- Hong, S.-I., Hasche, L., & Bowland, S. (2009). Structural relationships between social activities and longitudinal trajectories of depression among older adults. *The Gerontologist*, *49*(1), 1-11
- Huang, C., Momma, H., Cui, Y., Chujo, M., Otomo, A., Sugiyama, S., . . . Nagatomi, R. (2017). Independent and combined relationship of habitual unhealthy eating behaviors with depressive symptoms: A prospective study. *J Epidemiol*, *27*(1), 42-47. doi: 10.1016/j.je.2016.08.005
- Hume, C., Timperio, A., Veitch, J., Salmon, J., Crawford, D., & Ball, K. (2011). Physical activity, sedentary behavior, and depressive symptoms among adolescents. *J Phys Act Health*, *8*(2), 152-156
- Icks, A., Albers, B., Haastert, B., Pechlivanis, S., Pundt, N., Slomiany, U., . . . Moebus, S. (2013). Risk for High Depressive Symptoms in Diagnosed and Previously Undetected Diabetes: 5-Year Follow-Up Results of the Heinz Nixdorf Recall Study. *PLoS ONE*, *8* (2) (no pagination)(e56300)
- Jacka, F. N., Cherbuin, N., Anstey, K. J., & Butterworth, P. (2014). Dietary patterns and depressive symptoms over time: Examining the relationships with socioeconomic position, health behaviours and cardiovascular risk. *PLoS ONE*, *9* (1) (no pagination)(e87657)
- Jankowska, E. A., Ponikowska, B., Drohomirecka, A., Maj, J., Biel, B., Banasiak, W., . . . Ponikowski, P. (2009). Depression in men with chronic heart failure: Prevalence, hormone determinants, detrimental impact on exercise capacity and survival. *Journal of the American College of Cardiology*, *53* (10), A157
- Johnson, W., Corley, J., Starr, J. M., & Deary, I. J. (2011). Psychological and Physical Health at Age 70 in the Lothian Birth Cohort 1936: Links With Early Life IQ, SES, and Current Cognitive Function and Neighborhood Environment. *Health Psychology*, *30*(1), 1-11
- Kaplan, G. A., Strawbridge, W. J., Camacho, T., & Cohen, R. D. (1993). Factors associated with change in physical functioning in the elderly: A six-year prospective study. *Journal of Aging and Health*, *5*(1), 140-153
- Lampinen, P., & Heikkinen, E. (2003). Reduced mobility and physical activity as predictors of depressive symptoms among community-dwelling older adults: an eight-year follow-up study. *Aging Clin Exp Res*, *15*(3), 205-211
- Lee, C. T., Yeh, C. J., Lee, M. C., Lin, H. S., Chen, V. C., Hsieh, M. H., . . . Lai, T. J. (2012). Leisure activity, mobility limitation and stress as modifiable risk factors for depressive symptoms in the elderly: results of a national longitudinal study. *Arch Gerontol Geriatr*, *54*(2), e221-229. doi: 10.1016/j.archger.2011.06.014
- Lehto, S. M., Ruusunen, A., Tolmunen, T., Voutilainen, S., Tuomainen, T. P., & Kauhanen, J. (2013). Dietary zinc intake and the risk of depression in middle-aged men: a 20-year prospective follow-up study. *J Affect Disord*, *150*(2), 682-685. doi: 10.1016/j.jad.2013.03.027
- Naicker, K., Galambos, N. L., Zeng, Y., Senthilselvan, A., & Colman, I. (2013). Social, demographic, and health outcomes in the 10 years following adolescent Depression. *Journal of Adolescent Health*, *52*(5), 533-538
- Needham, B. L., & Crosnoe, R. (2005). Overweight status and depressive symptoms during adolescence. *J Adolesc Health*, *36*(1), 48-55. doi: 10.1016/j.jadohealth.2003.12.015
- Nguyen, H. Q., Koepsell, T., Unutzer, J., Larson, E., & LoGerfo, J. P. (2008). Depression and use of a health plan-sponsored physical activity program by older adults. *Am J Prev Med*, *35*(2), 111-117. doi: 10.1016/j.amepre.2008.04.014

- Pan, A., Sun, Q., Czernichow, S., Kivimaki, M., Okereke, O. I., Lucas, M., . . . Hu, F. B. (2011). Bidirectional association between depression and obesity in middle-aged and older women. *International Journal of Obesity*, 07
- Picavet, H. S. J., Milder, I., Kruize, H., de Vries, S., Hermans, T., & Wendel-Vos, W. (2016). Greener living environment healthier people? Exploring green space, physical activity and health in the Doetinchem Cohort Study. *Preventive Medicine*, 89, 7-14
- Raudsepp, L. (2016). Bidirectional association between sedentary behaviour and depressive symptoms in adolescent girls. *European Journal of Sport Science*, 16(8), 1153-1158
- Roiger, T., Weidauer, L., & Kern, B. (2015). A longitudinal pilot study of depressive symptoms in concussed and injured/nonconcussed National Collegiate Athletic Association Division I student-athletes. *J Athl Train*, 50(3), 256-261. doi: 10.4085/1062-6050-49.3.83
- Ruggero, C. J., Petrie, T., Sheinbein, S., Greenleaf, C., & Martin, S. (2015). Cardiorespiratory Fitness May Help in Protecting Against Depression Among Middle School Adolescents. *J Adolesc Health*, 57(1), 60-65. doi: 10.1016/j.jadohealth.2015.03.016
- Ruusunen, A., Lehto, S. M., Mursu, J., Tolmunen, T., Tuomainen, T. P., Kauhanen, J., & Voutilainen, S. (2014). Dietary patterns are associated with the prevalence of elevated depressive symptoms and the risk of getting a hospital discharge diagnosis of depression in middle-aged or older Finnish men. *J Affect Disord*, 159, 1-6. doi: 10.1016/j.jad.2014.01.020
- Safar, M. E., Gnakanene, J. B., Bahous, S. A., Yannoutsos, A., & Thomas, F. (2017). Longitudinal Study of Hypertensive Subjects With Type 2 Diabetes Mellitus: Overall and Cardiovascular Risk. *Hypertension*, 69(6), 1029-1035. doi: 10.1161/hypertensionaha.116.08962
- Sanchez-Villegas, A., Doreste, J., Schlatter, J., Pla, J., Bes-Rastrollo, M., & Martinez- Gonzalez, M. (2009). Association between folate, vitamin B6 and vitamin B12 intake and depression in the SUN cohort study. *Journal of Human Nutrition and Dietetics*, 22(2), 122-133
- Sigfusdottir, I. D., Asgeirsdottir, B. B., Sigurdsson, J. F., & Gudjonsson, G. H. (2011). Physical activity buffers the effects of family conflict on depressed mood: A study on adolescent girls and boys. *Journal of Adolescence*, 34(5), 895-902. doi: https://doi.org/10.1016/j.adolescence.2011.01.003
- Smagula, S. F., Ancoli-Israel, S., Blackwell, T., Boudreau, R., Stefanick, M. L., Paudel, M. L., . . . Cauley, J. A. (2015). Circadian Rest-Activity Rhythms Predict Future Increases in Depressive Symptoms among Community-Dwelling Older Men. *American Journal of Geriatric Psychiatry*, 23(5), 495-505
- Spaeth, M., Weichold, K., & Silbereisen, R. K. (2015). The development of leisure boredom in early adolescence: Predictors and longitudinal associations with delinquency and depression. *Dev Psychol*, 51(10), 1380-1394. doi: 10.1037/a0039480
- Sui, X., Brown, W. J., Lavie, C. J., West, D. S., Pate, R. R., Payne, J. P. W., & Blair, S. N. (2015). Associations between television watching and car riding behaviors and development of depressive symptoms: A prospective study. *Mayo Clinic Proceedings*, 90(2), 184-193
- Sui, X., Laditka, J. N., Church, T. S., Hardin, J. W., Chase, N., Davis, K., & Blair, S. N. (2009). Prospective study of cardiorespiratory fitness and depressive symptoms in women and men. *J Psychiatr Res*, 43(5), 546-552. doi: 10.1016/j.jpsychires.2008.08.002
- Testa, C. R., & Steinberg, L. (2010). Depressive symptoms and health-related risk-taking in adolescence. *Suicide Life Threat Behav*, 40(3), 298-305. doi: 10.1521/suli.2010.40.3.298
- Teychenne, M., Abbott, G., Ball, K., & Salmon, J. (2014). Prospective associations between sedentary behaviour and risk of depression in socio-economically disadvantaged women. *Prev Med*, 65, 82-86. doi: 10.1016/j.ypmed.2014.04.025
- Tikhonoff, V., Hardy, R., Deanfield, J., Friberg, P., Kuh, D., Muniz, G., . . . Richards, M. (2014). Symptoms of anxiety and depression across adulthood and blood pressure in late middle age: The 1946 British birth cohort. *Journal of Hypertension*, 32(8), 1590-1599

- van Ramele, S., Aoki, H., Kerkhoffs, G. M. M. J., & Gouttebarga, V. (2017). Mental health in retired professional football players: 12-month incidence, adverse life events and support. *Psychology of Sport & Exercise, 28*, 85-90
- Veronese, N., Stubbs, B., Trevisan, C., Bolzetta, F., De Rui, M., Solmi, M., . . . Sergi, G. (2017). Poor Physical Performance Predicts Future Onset of Depression in Elderly People: Pro.V.A. Longitudinal Study. *Phys Ther.* doi: 10.1093/ptj/pzx017
- Wu, X., Tao, S., Zhang, S., Zhang, Y., Chen, K., Yang, Y., . . . Tao, F. (2016). Impact of screen time on mental health problems progression in youth: A 1-year follow-up study. *BMJ Open, 6* (11) (no pagination)(e011533)
- Yu, M., & Whitbeck, L. B. (2016). A prospective, longitudinal study of cigarette smoking status among North American Indigenous adolescents. *Addict Behav, 58*, 35-41. doi: 10.1016/j.addbeh.2016.02.007
- Zelber-Sagi, S., Toker, S., Armon, G., Melamed, S., Berliner, S., Shapira, I., . . . Shibolet, O. (2013). Elevated alanine aminotransferase independently predicts new onset of depression in employees undergoing health screening examinations. *Psychological medicine, 43*(12), 2603-2613

#### 7) Not original:

- Hayward, J., Jacka, F. N., Waters, E., & Allender, S. (2014). Lessons from obesity prevention for the prevention of mental disorders: the primordial prevention approach. *BMC Psychiatry, 14*, 254. doi: 10.1186/s12888-014-0254-3
- O'Mathúna, D. P. (2013). Spending More Leisure Time Physically Active Can Add Years to Your Life. *Integrative Medicine Alert, 16*(1), 6-8
- Sallis, J. F. (2011). Leisure-time Physical Activity and Depression in Adolescence. *Clinical Journal of Sport Medicine, 21*(1), 72-73
- Smith, T. W. (2006). Blood, sweat, and tears: Exercise in the management of mental and physical health problems. *Clinical Psychology: Science and Practice, 13*(2), 198-202
- Streiner, D. L. (2003). Physical activity and depression in older adults. *Clin J Sport Med, 13*(4), 274
- van Gool, C. H., Kempen, G. I., Bosma, H., van Boxtel, M. P., Jolles, J., & van Eijk, J. T. (2007). "Associations between lifestyle and depressed mood: Longitudinal results from the Maastricht Aging Study". Erratum. *American Journal of Public Health, 97*(12), 2121
- Wolff, E., & Strohle, A. (2010). Causal associations of physical activity/exercise and symptoms of depression and anxiety. *Arch Gen Psychiatry, 67*(5), 540-541. doi: 10.1001/archgenpsychiatry.2010.44
- Woodend, A., Scholmerich, V., & Denktas, S. (2015). "Nudges" to Prevent Behavioral Risk Factors Associated With Major Depressive Disorder. *Am J Public Health, 105*(11), 2318-2321. doi: 10.2105/ajph.2015.302820

## 8) Thesis, poster or conference presentation:

- Bacon, S. L., Arsenault, A., Meloche, B., & Lavoie, K. L. (2013). The association of mood and anxiety disorders on physical activity changes over 2 years. *Psychosomatic Medicine, 75* (3), A-33
- Baker, S., Chew-Graham, C. A., Wilkie, R., & McBeth, J. (2016). Maintaining mental health in older people with musculoskeletal pain: A longitudinal cohort study. *Annals of the Rheumatic Diseases, 75*, 656-657
- Bamba Gaye, B., Prugger, C., Perier, M. C., Pannier, F., Thomas, F., Boutouyrie, P., . . . Empana, J. P. (2015). High depressive symptoms is inversely associated with ideal cardiovascular health in 10 157 from the Paris prospective study 3. *European Journal of Preventive Cardiology, 1*), S1
- Baumeister, S. E., Leitzmann, M., Bahls, M., Dorr, M., Schmid, D., Schomerus, G., . . . Grabe, H. (2016). Associations of physical activity and cardiorespiratory fitness with incident and recurrent major depressive disorder, depressive symptoms and incident anxiety in a general population. *European Journal of Epidemiology, 31*, S21-S22
- Berntson, J., Stewart, K. R., Vraney, E., Khambaty, T., & Stewart, J. C. (2013). Depressive symptoms are associated with poor adherence to some lifestyle but not medication recommendations to prevent cardiovascular disease: National health and nutrition examination survey (NHANES) 2005-2010. *Psychosomatic Medicine, 75* (3), A-147
- Bossen, D., Veenhof, C., Kloek, C., De Bakker, D., & Dekker, J. (2015). The association between psychological factors and physical activity levels in patients with knee and hip osteoarthritis. *Physiotherapy (United Kingdom), 101*, eS165-eS166
- Bourlas, A., Stamm, J., Baugh, C., Daneshvar, D., Breaud, A., Robbins, C., . . . Stern, R. (2014). Relationship between age of first exposure to tackle football and later-life mood, behaviour and cognition. *Brain Injury, 28* (5-6), 755-756
- Cacciatore, F., Mazzella, F., Ferrara, N., Furgi, G., Rengo, F., Della Valle, E., & Abete, P. (2016). The usual physical activity predicts mortality in elderly patients with advanced heart failure. *European Journal of Heart Failure, 18*, 408-409
- Calhoun, D., Mete, M., Fretts, A. M., Best, L., Welty, T., & Howard, B. V. (2012). Weight gain and depression in a population with high prevalence of obesity: Strong heart family study. *Diabetes, 61*, A203
- Chrysohoou, C., Panagiotakos, D., Pitsavos, C., Skoumas, J., Lentzas, J., Zeibekis, A., . . . Stefanadis, C. (2009). Determinants of physical inactivity among men and women from Greece; a 5-year follow-up of the ATTICA Study. *European Heart Journal, 30*, 511-512
- Dallmeier, D., Fischer, I., Braisch, U., Rothenbacher, D., Klenk, J., Gahr, M., . . . Denking, M. (2016). The association of antidepressive medication with physical activity in older adults: The ActiFE study. *European Geriatric Medicine, 7*, S231-S232
- Denking, M., Fischer, I., Herbolzheimer, F., Rapp, K., & Nikolaus, T. (2012). Accelerometer-based physical activity in a large observational cohort (ActiFE-Ulm) - Associations with multimедication and falls. *Internist, 53*, 52-53
- Dunlop, D. D., Song, J., Semanik, P. A., Sharma, L., Bathon, J. M., Eaton, C., . . . Chang, R. W. (2013). Physical activity is associated with reduced incident disability: Evidence from the osteoarthritis initiative. *Arthritis and Rheumatism, 65*, S103
- Fenton, S., Duda, J., Klocke, R., Abishek, A., Rushton, A., Doherty, M., . . . White, D. (2016). The association of light and moderate-to-vigorous walking with incident poor health outcomes over two years in people with or at high risk of knee osteoarthritis. *Arthritis and Rheumatology, 68*, 2598-2600

- Fortes, C., Mastroeni, S., Sperati, A., Pacifici, R., Zuccaro, P., Forastiere, F., . . . Ebrahim, S. (2013). Walking outdoors four times weekly for at least 15 minutes is associated with longevity in a cohort of very elderly people. *Annals of Nutrition and Metabolism*, *63*, 1014-1015
- Freitas, C., Deschenes, S., Au, B., Smith, K., & Schmitz, N. (2015). Lifestyle differences in the co-occurrence of depressive symptoms and metabolic abnormalities: Further evidence for a metabolic subtype of depression? *Psychosomatic Medicine*, *77* (3), A130
- Gafarov, V., Panov, D., Gromova, E., Gagulin, I., & Gafarova, A. (2013). Depression, lifestyle and risk incidence of an arterial hypertension in female population in russia: Longitudinal study. *Journal of Diabetes*, *5*, 144
- Gaye, B., Prugger, C., Perier, M. C., Plichart, M., Thomas, F., Guibout, C., . . . Empana, J. P. (2015). High depressive symptoms are inversely associated with ideal cardiovascular health? The paris prospective study III. *European Journal of Epidemiology*, *30* (8), 728-729
- George, E., Jorm, L., Kolt, G., Bambrick, H., & Lujic, S. (2010). Physical activity and psychological distress in older men: Findings from the NSW 45 and Up Study. *Journal of Science and Medicine in Sport*, *13*, e54-e55
- Greco, A., Luyckx, K., Baretta, D., Cappelletti, E., D'Addario, M., Monzani, D., . . . Steca, P. (2016). Longitudinal trajectories of depression and lifestyle behaviours in acute coronary syndrome patients. *European Heart Journal: Acute Cardiovascular Care*, *5*, 331
- Grover, S. A., Banwell, B., Khan, S., & Yeh, E. A. (2013). Exercise, fatigue and depression in a paediatric multiple sclerosis population. *Multiple Sclerosis*, *1*, 332
- Heikura, U., Ebeling, H., Rodriguez, A., Nordstrom, T., & Taanila, A. (2011). Leisure time activities and behavioral/emotional problems in adolescents with mild cognitive limitations. *European Child and Adolescent Psychiatry*, *20*, S98-S99
- Hoare, E., Millar, L., Fuller-Tyskiewicz, M., Skouteris, H., Nichols, M., Jacka, F., . . . Allender, S. (2013). Higher odds of depressive symptomatology associated with obesity risk in Australian adolescents. *Obesity Research and Clinical Practice*, *7*, e54
- Hsu, H. C. (2013). Multiple trajectories of successful aging in Taiwan. *International Psychogeriatrics*, *25*, S24
- Jacka, F. N., Cherbuin, N., Anstey, K., & Butterworth, P. (2013). Dietary patterns and the risk for depression in Australian adults. *Psychotherapy and Psychosomatics*, *82*, 50
- Johnson, S. T., Al Sayah, F., Mathe, N., & Johnson, J. A. (2015). Depressive symptoms and diabetes distress associated with physical inactivity and poorer dietary practices in adults with type 2 diabetes. *Diabetes*, *64*, A222
- Kang, H. J., Jeong, B. O., Kim, S. Y., Bae, K. Y., Kim, S. W., Kim, J. M., . . . Stewart, R. (2013). Suicidal ideation in an older Korean population: A 2-year longitudinal study. *International Psychogeriatrics*, *25*, S179
- Kelleher, C., Doyle, F., Conroy, R., & Hickey, A. (2013). Does pain mediate the relationship between physical activity and depression in older adults? Findings from two nationally representative studies. *Irish Journal of Medical Science*, *182*, S285
- Kim, K., Lee, S., Cho, E., Lee, H., & Lee, M. (2014). Depression, physical activity and health related quality of life in patients with severe chronic obstructive pulmonary disease. *American Journal of Respiratory and Critical Care Medicine. Conference: American Thoracic Society International Conference, ATS*, *189*(no pagination)
- Ku, P. W., Chen, L. J., & Chu, D. C. (2013). Associations of physical activity with cognitive impairment in taiwanese older adults: Eight-year follow-up. *Alzheimer's and Dementia*, *1*, P632
- Lemogne, C., Meneton, P., Wiernik, E., Quesnot, A., Consoli, S. M., Ducimetiere, P., . . . Marie, Z. (2016). When blue-collars feel blue: Depression and low occupational grade as synergistic predictors of incident coronary heart disease in the Gazel cohort. *Psychosomatic Medicine*, *78* (3), A28-A29



- Mace, C. J., Moyes, S., & Kerse, N. (2016). Longitudinal analysis of physical activity and depressive symptoms in advanced age: Lilacs NZ. *Journal of the American Geriatrics Society*, *64*, S79-S80
- Michal, M., Konig, J., Wiltink, J., Espinola-Klein, C., Munzel, T., Blettner, M., . . . Beutel, M. E. (2015). Cardiovascular disease and risk factors are associated with the incidence of depressive symptoms in never depressed individuals. *Psychosomatic Medicine*, *77* (3), A145
- Mihrshahi, S., Dobson, A., & Mishra, G. (2013). Fruit consumption is associated with lower risk of depression in mid-age women. *Annals of Nutrition and Metabolism*, *63*, 830
- Morgan, M. B. (2004). Sports participation in the lives of adolescent females: Who is playing and what is the relationship with body mass index, weight concerns, self-esteem, and depression? *Dissertation Abstracts International: Section B: The Sciences and Engineering*, *65*(4-B), 2105
- Nanchen, D., Auer, R., Gencer, B., Muller, O., Juni, P., Matter, C. M., . . . Rodondi, N. (2015). Factors associated with improvement of depression after acute coronary syndromes. *European Heart Journal*, *36*, 291
- Ng, T. P. (2014). APOE-e4 and cognitive function: Gene-environmental interactions observed in the Singapore longitudinal ageing studies. *Annals of the Academy of Medicine Singapore*, *1*), S32-S33
- Oh, D. J., Kim, K. W., Park, J. Y., Oh, M., Kim, K., Hong, J., . . . Kim, T. H. (2015). Suicidality-based prediction of suicide attempts in a community-dwelling elderly. *International Psychogeriatrics*, *27*, S68
- Ozturk, G., Moreno, C., & Lowden, A. (2016). Daylight exposure, depression and sleep in Swedish adolescents. *Journal of Sleep Research*, *25*, 336-337
- Palakodeti, S., Uratsu, C. S., Schmittiel, J. A., & Grant, R. W. (2014). From inactive to active: Changes in physical activity among adults with diabetes. *Diabetes*, *63*, A302
- Patten, C. A., Choi, W. S., Vickers, K. S., & Pierce, J. P. (2001). Persistence of depressive symptoms in adolescents. *Neuropsychopharmacology*, *25*(5 Suppl), S89-91. doi: 10.1016/s0893-133x(01)00323-2
- Pavey, T., Peeters, G., Bauman, A., & Brown, W. (2013). Does vigorous intensity physical activity provide additional health benefits beyond those of moderate intensity in mid-aged women? *Journal of Science and Medicine in Sport*, *16*, e53
- Peeters, G., Burton, N., & Brown, W. (2012). Associations between sitting time and a broad range of symptoms in mid-age women. *Journal of Science and Medicine in Sport*, *15*, S286
- Rantanen, T. (2015). Physical activity as primary and secondary prevention. *European Geriatric Medicine*, *6*, S2
- Smith, T. W., Eagle, D. E., & Proeschold-Bell, R. J. (2015). Testing the reciprocal association between depressive symptoms and metabolic syndrome: A four-wave prospective study. *Psychosomatic Medicine*, *77* (3), A79
- Stuchlik, P., Allen, N., Harville, E., Chen, W., & Bazzano, L. (2015). Cardiovascular risk factor trajectories from childhood to adulthood and depression in middle age: The Bogalusa heart study. *Circulation. Conference: American Heart Association's*, *132*(no pagination)
- Van Uffelen, J., Burton, N., Van Gellecum, Y., Peeters, G., Heesch, K., & Brown, W. (2012). Concurrent and prospective associations between sitting time, physical activity and depression in mid-aged Australian women. *Journal of Science and Medicine in Sport*, *15*, S23
- White, D. K., Fielding, R., Gross, K. D., Nevitt, M. C., Lewis, C. E., Torner, J., & Neogi, T. (2013). Longitudinal decline in steps/day in older adults with or at high risk of knee OA. *Arthritis and Rheumatism*, *65*, S458
- Yang, H., Hsiao, T., Lien, M., & Yeh, C. (2015). Shared and unique factors between metabolic syndrome and mild psychiatric disorders: A longitudinal population-based study initiated by lanced hospital, Taiwan. *European Psychiatry*, *30*, 731

Zijlema, W. L., Klijs, B., Stolk, R. P., & Rosmalen, J. G. M. (2015). (Un)Healthy in the city: Respiratory, metabolic and mental health associated with urbanicity. *European Journal of Epidemiology*, *30*(8), 836

**9) Included data one already included cohort:**

- Camacho, T. C., Roberts, R. E., Lazarus, N. B., Kaplan, G. A., & Cohen, R. D. (1991). Physical activity and depression: evidence from the Alameda County Study. *Am J Epidemiol*, *134*(2), 220-231
- Chi, S. H., Wang, J. Y., & Tsai, A. C. (2016). Combined association of leisure-time physical activity and fruit and vegetable consumption with depressive symptoms in older Taiwanese: Results of a national cohort study. *Geriatr Gerontol Int*, *16*(2), 244-251. doi: 10.1111/ggi.12459
- Ernstsen, L., Rangul, V., Nauman, J., Nes, B. M., Dalen, H., Krokstad, S., . . . Wisloff, U. (2016). Protective Effect of Regular Physical Activity on Depression After Myocardial Infarction: The HUNT Study. *Am J Med*, *129*(1), 82-88.e81. doi: 10.1016/j.amjmed.2015.08.012
- Hamer, M., Molloy, G. J., de Oliveira, C., & Demakakos, P. (2009). Leisure time physical activity, risk of depressive symptoms, and inflammatory mediators: the English Longitudinal Study of Ageing. *Psychoneuroendocrinology*, *34*(7), 1050-1055. doi: 10.1016/j.psyneuen.2009.02.004
- Lucas, M., Mekary, R., Pan, A., Mirzaei, F., O'Reilly, E. J., Willett, W. C., . . . Ascherio, A. (2011). Relation between clinical depression risk and physical activity and time spent watching television in older women: A 10-year prospective follow-up study. *American Journal of Epidemiology*, *174*(9), 1017-1027
- Mekary, R. A., Lucas, M., Pan, A., Okereke, O. I., Willett, W. C., Hu, F. B., & Ding, E. L. (2013). Isotemporal substitution analysis for physical activity, television watching, and risk of depression. *Am J Epidemiol*, *178*(3), 474-483. doi: 10.1093/aje/kws590
- Peeters, G., Hockey, R., & Brown, W. (2014). Should physical activity intervention efforts take a whole population, high-risk or middle road strategy? *J Phys Act Health*, *11*(5), 966-970. doi: 10.1123/jpah.2012-0275

**10) Assessed physical activity or depression retrospectively:**

- Almeida, O. P., Hankey, G. J., Yeap, B. B., Golledge, J., McCaul, K., & Flicker, L. (2013). A risk table to assist health practitioners assess and prevent the onset of depression in later life. *Prev Med*, *57*(6), 878-882. doi:10.1016/j.yjmed.2013.09.021
- Dakwar, E., Blanco, C., Lin, K. H., Liu, S. M., Warden, D., Trivedi, M., & Nunes, E. V. (2012). Exercise and mental illness: results from the National Epidemiologic Survey on Alcohol and Related Conditions (NESARC). *J Clin Psychiatry*, *73*(7), 960-966. doi:10.4088/JCP.11m07484
- Gall, S., Sanderson, K., Smith, K., Patton, G., Dwyer, T., & Venn, A. (2016). Bi-directional associations between healthy lifestyles and mood disorders in young adults: The Childhood Determinants of Adult Health Study. *Psychol Med*, *46*(12), 2535-2548.
- Jacka, F. N., Pasco, J. A., Williams, L. J., Leslie, E. R., Dodd, S., Nicholson, G. C., . . . Berk, M. (2011). Lower levels of physical activity in childhood associated with adult depression. *J Sci Med Sport*, *14*(3), 222-226. doi:10.1016/j.jsams.2010.10.458

### 11) Evaluated PA as a continuous measure:

- Bots, S., Tijhuis, M., Giampaoli, S., Kromhout, D., & Nissinen, A. (2008). Lifestyle- and diet-related factors in late-life depression--a 5-year follow-up of elderly European men: the FINE study. *Int J Geriatr Psychiatry, 23*(5), 478-484. doi: 10.1002/gps.1919
- Edwards, K. A., Molton, I. R., Smith, A. E., Ehde, D. M., Bombardier, C. H., Battalio, S. L., & Jensen, M. P. (2016). Relative Importance of Baseline Pain, Fatigue, Sleep, and Physical Activity: Predicting Change in Depression in Adults With Multiple Sclerosis. *Archives of Physical Medicine & Rehabilitation, 97*(8), 1309-1315
- Rothon, C., Edwards, P., Bhui, K., Viner, R. M., Taylor, S., & Stansfeld, S. A. (2010). Physical activity and depressive symptoms in adolescents: a prospective study. *BMC Med, 8*, 32. doi: 10.1186/1741-7015-8-32
- Stavrakakis, N., Roest, A. M., Verhulst, F., Ormel, J., de Jonge, P., & Oldehinkel, A. J. (2013). Physical activity and onset of depression in adolescents: A prospective study in the general population cohort TRAILS. *Journal of Psychiatric Research, 47*(10), 1304-1308
- Teychenne, M., Abbott, G., Lamb, K. E., Rosenbaum, S., & Ball, K. (2017). Is the link between movement and mental health a two-way street? Prospective associations between physical activity, sedentary behaviour and depressive symptoms among women living in socioeconomically disadvantaged neighbourhoods. *Preventive Medicine, 102*(Supplement C), 72-78. doi: <https://doi.org/10.1016/j.ypmed.2017.07.005>
- Uebelacker, L. A., Eaton, C. B., Weisberg, R., Sands, M., Williams, C., Calhoun, D., . . . Taylor, T. (2013). Social support and physical activity as moderators of life stress in predicting baseline depression and change in depression over time in the Women's Health Initiative. *Soc Psychiatry Psychiatr Epidemiol, 48*(12), 1971-1982. doi: 10.1007/s00127-013-0693-z
- Yu, T., Ter Riet, G., Puhan, M. A., & Frei, A. (2017). Physical activity and risk of comorbidities in patients with chronic obstructive pulmonary disease: A cohort study. *npj Primary Care Respiratory Medicine, 27* (1) (no pagination)(36)

### 12) Unable to calculate/convert OR/HR/RR

- Galambos, N., Leadbeater, B., & Barker, E. (2004). Gender differences in and risk factors for depression in adolescence: A 4-year longitudinal study. *International Journal of Behavioral Development, 28*(1), 16-25. doi: 10.1080/01650250344000235
- Katz, P. P., & Yelin, E. H. (2001). Activity loss and the onset of depressive symptoms: do some activities matter more than others? *Arthritis Rheum, 44*(5), 1194-1202. doi: 10.1002/1529-0131(200105)44:5<1194::aid-anr203>3.0.co;2-6
- Kivela, S. L., Kongas-Saviaro, P., Kimmo, P., Kesti, E., & Laippala, P. (1996). Health, health behaviour and functional ability predicting depression in old age: A longitudinal study. *International Journal of Geriatric Psychiatry, 11*(10), 871-877
- Paffenbarger Jr, R. S., Lee, I. M., & Leung, R. (1994). Physical activity and personal characteristics associated with depression and suicide in American college men. *Acta Psychiatrica Scandinavica, Supplement, 89*(377), 16-22
- Samuel B. Harvey, Simon Øverland, Stephani L. Hatch, Simon Wessely, Arnstein Mykletun, & Matthew Hotopf. Exercise and the Prevention of Depression: Results of the HUNT Cohort Study. *American Journal of Psychiatry, 0*(0), appi.ajp.2017.16111223. doi: 10.1176/appi.ajp.2017.16111223

### 13) Papers included in meta-analyses

- Almeida, O. P., Norman, P., Hankey, G., Jamrozik, K., & Flicker, L. (2006). Successful mental health aging: Results from a longitudinal study of older Australian men. *American Journal of Geriatric Psychiatry, 14*(1), 27-35
- Augestad, L. B., Slettemoen, R. P., & Flanders, W. D. (2008). Physical activity and depressive symptoms among Norwegian adults aged 20-50. *Public Health Nurs, 25*(6), 536-545. doi: 10.1111/j.1525-1446.2008.00740.x
- Baumeister, S. E., Leitzmann, M. F., Bahls, M., Dorr, M., Schmid, D., Schomerus, G., . . . Grabe, H. J. (2017). Associations of leisure-time and occupational physical activity and cardiorespiratory fitness with incident and recurrent major depressive disorder, depressive symptoms, and incident anxiety in a general population. *Journal of Clinical Psychiatry, 78*(1), e41-e47
- Beard, J. R., Heathcote, K., Brooks, R., Earnest, A., & Kelly, B. (2007). Predictors of mental disorders and their outcome in a community based cohort. *Soc Psychiatry Psychiatr Epidemiol, 42*(8), 623-630. doi: 10.1007/s00127-007-0182-3
- Brown, D. R., Croft, J. B., Anda, R. F., Barrett, D. H., & Escobedo, L. G. (1996). Evaluation of smoking on the physical activity and depressive symptoms relationship. / Influence de l' impact de la cigarette sur l' activite physique et la relation avec les symptomes depressifs. *Medicine & Science in Sports & Exercise, 28*(2), 233-240
- Cabello, M., Miret, M., Caballero, F. F., Chatterji, S., Naidoo, N., Kowal, P., . . . Ayuso-Mateos, J. L. (2017). The role of unhealthy lifestyles in the incidence and persistence of depression: A longitudinal general population study in four emerging countries. *Globalization and Health, 13* (1) (no pagination)(18)
- Chang, M., Snaedal, J., Einarsson, B., Bjornsson, S., Saczynski, J. S., Aspelund, T., . . . Jonsson, P. V. (2016). The Association Between Midlife Physical Activity and Depressive Symptoms in Late Life: Age Gene/Environment Susceptibility-Reykjavik Study. *The journals of gerontology, Series A, Biological sciences and medical sciences, 71*(4), 502-507
- Chang, S. C., Pan, A., Kawachi, I., & Okereke, O. I. (2016). Risk factors for late-life depression: A prospective cohort study among older women. *Preventive Medicine, 91*, 144-151
- Chen, J., & Millar, W. J. (1999). Health effects of physical activity. *Health Rep, 11*(1), 21-30(Eng); 21-31(Fre)
- Choi, Y., Park, E. C., Kim, J. H., Yoo, K. B., Choi, J. W., & Lee, K. S. (2014). A change in social activity and depression among Koreans aged 45 years and more: Analysis of the Korean Longitudinal Study of Aging (2006-2010). *International Psychogeriatrics, 31*(3)
- Clark, C., Haines, M. M., Head, J., Klineberg, E., Arephin, M., Viner, R., . . . Stansfeld, S. A. (2007). Psychological symptoms and physical health and health behaviours in adolescents: a prospective 2-year study in East London. *Addiction, 102*(1), 126-135
- Collard, R. M., Comijs, H. C., Naarding, P., Penninx, B. W., Milaneschi, Y., Ferrucci, L., & Oude Voshaar, R. C. (2015). Frailty as a Predictor of the Incidence and Course of Depressed Mood. *Journal of the American Medical Directors Association, 16*(6), 509-514
- Cooper-Patrick, L., Ford, D. E., Mead, L. A., Chang, P. P., & Klag, M. J. (1997). Exercise and depression in midlife: a prospective study. *Am J Public Health, 87*(4), 670-673
- Da Silva, M. A., Singh-Manoux, A., Brunner, E. J., Kaffashian, S., Shipley, M. J., Kivimaki, M., & Nabi, H. (2012). Bidirectional association between physical activity and symptoms of anxiety and depression: The whitehall II study. *European Journal of Epidemiology, 27*(7), 537-546
- Espana-Romero, V., Artero, E. G., Lee, D. C., Sui, X., Baruth, M., Ruiz, J. R., . . . Blair, S. N. (2013). A prospective study of ideal cardiovascular health and depressive symptoms. *Psychosomatics, 54*(6), 525-535. doi: 10.1016/j.psych.2013.06.016

- Farmer, M. E., Locke, B. Z., Moscicki, E. K., Dannenberg, A. L., Larson, D. B., & Radloff, L. S. (1988). Physical activity and depressive symptoms: the NHANES I Epidemiologic Follow-up Study. *Am J Epidemiol*, *128*(6), 1340-1351
- Gallegos-Carrillo, K., Denova-Gutierrez, E., Dosamantes-Carrasco, L. D., Borges, G., Macias, N., Flores, Y. N., . . . Salmeron, J. (2013). Physical activity and reduced risk of depression: Results of a longitudinal study of mexican adults. *Health Psychology*, *32*(6), 609-615
- Garcia-Pena, C., Wagner, F. A., Sanchez-Garci, S., Espinel-Bermudez, C., Juarez-Cedillo, T., Perez-Zepeda, M., . . . Gallo, J. J. (2013). Late-life depressive symptoms: Prediction models of change. *Journal of Affective Disorders*, *150*(3), 886-894
- Giltay, E. J., Zitman, F. G., & Kromhout, D. (2006). Dispositional optimism and the risk of depressive symptoms during 15 years of follow-up: The Zutphen Elderly Study. *Journal of Affective Disorders*, *91*(1), 45-52
- Groffen, D. A. I., Koster, A., Bosma, H., Van Den Akker, M., Kempen, G. I. J. M., Van Eijk, J. T. M., . . . Kritchevsky, S. B. (2013). Unhealthy lifestyles do not mediate the relationship between socioeconomic status and incident depressive symptoms: The health ABC study. *American Journal of Geriatric Psychiatry*, *21*(7), 664-674
- Hiles, S. A., Baker, A. L., de Malmanche, T., McEvoy, M., Boyle, M., & Attia, J. (2015). Unhealthy lifestyle may increase later depression via inflammation in older women but not men. *Journal of Psychiatric Research*, *63*, 65-74
- Jerstad, S. J., Boutelle, K. N., Ness, K. K., & Stice, E. (2010). Prospective reciprocal relations between physical activity and depression in female adolescents. *J Consult Clin Psychol*, *78*(2), 268-272. doi: 10.1037/a0018793
- Jonsdottir, I. H., Rodjer, L., Hadzibajramovic, E., Borjesson, M., & Ahlberg, G., Jr. (2010). A prospective study of leisure-time physical activity and mental health in Swedish health care workers and social insurance officers. *Prev Med*, *51*(5), 373-377. doi: 10.1016/j.ypmed.2010.07.019
- Joshi, S., Mooney, S. J., Kennedy, G. J., Benjamin, E. O., Ompad, D., Rundle, A. G., . . . Cerda, M. (2016). Beyond METs: Types of physical activity and depression among older adults. *Age and Ageing*, *45*(1), 103-109
- Koster, A., Bosma, H., Kempen, G. I. J. M., Penninx, B. W. J. H., Beekman, A. T. F., Deeg, D. J. H., & van Eijk, J. T. M. (2006). Socioeconomic differences in incident depression in older adults: The role of psychosocial factors, physical health status, and behavioral factors. *Journal of Psychosomatic Research*, *61*(5), 619-627. doi: <https://doi.org/10.1016/j.jpsychores.2006.05.009>
- Ku, P. W., Fox, K. R., & Chen, L. J. (2009). Physical activity and depressive symptoms in Taiwanese older adults: a seven-year follow-up study. *Prev Med*, *48*(3), 250-255
- Kuwahara, K., Honda, T., Nakagawa, T., Yamamoto, S., Akter, S., Hayashi, T., & Mizoue, T. (2015). Associations of leisure-time, occupational, and commuting physical activity with risk of depressive symptoms among Japanese workers: a cohort study. *Int J Behav Nutr Phys Act*, *12*, 119. doi: 10.1186/s12966-015-0283-4
- McKercher, C., Sanderson, K., Schmidt, M. D., Otahal, P., Patton, G. C., Dwyer, T., & Venn, A. J. (2014). Physical activity patterns and risk of depression in young adulthood: a 20-year cohort study since childhood. *Soc Psychiatry Psychiatr Epidemiol*, *49*(11), 1823-1834. doi: 10.1007/s00127-014-0863-7
- Messier, L., Elisha, B., Schmitz, N., Garipey, G., Malla, A., Lesage, A., . . . Strychar, I. (2013). Changes in depressive symptoms and changes in lifestyle-related indicators: a 1-year follow-up study among adults with type 2 diabetes in Quebec. *Can J Diabetes*, *37*(4), 243-248. doi: 10.1016/j.cjcd.2013.05.005

- Mihrshahi, S., Dobson, A. J., & Mishra, G. D. (2015). Fruit and vegetable consumption and prevalence and incidence of depressive symptoms in mid-age women: Results from the Australian longitudinal study on women's health. *European Journal of Clinical Nutrition*, *69*(5), 585-591
- Mikkelsen, S. S., Tolstrup, J. S., Flachs, E. M., Mortensen, E. L., Schnohr, P., & Flensborg-Madsen, T. (2010). A cohort study of leisure time physical activity and depression. *Prev Med*, *51*(6), 471-475. doi: 10.1016/j.ypmed.2010.09.008
- Mobily, K. E., Rubenstein, L. M., Lemke, J. H., O'Hara, M. W., & Wallace, R. B. (1996). Walking and depression in a cohort of older adults: the Iowa 65 plus rural health study. *Journal of Aging & Physical Activity*, *4*(2), 119-135
- Park, J. E., Lee, J. Y., Kim, B. S., Kim, K. W., Chae, S. H., & Cho, M. J. (2015). Above-moderate physical activity reduces both incident and persistent late-life depression in rural Koreans. *International Journal of Geriatric Psychiatry*, *30*(7), 766-775
- Pasco, J. A., Williams, L. J., Jacka, F. N., Henry, M. J., Coulson, C. E., Brennan, S. L., . . . Berk, M. (2011). Habitual physical activity and the risk for depressive and anxiety disorders among older men and women. *Int Psychogeriatr*, *23*(2), 292-298. doi: 10.1017/s1041610210001833
- Rius-Ottenheim, N., Geleijnse, J. M., Kromhout, D., Van Der Mast, R. C., Zitman, F. G., & Giltay, E. J. (2013). Physical activity after myocardial infarction: Is it related to mental health? *European Journal of Preventive Cardiology*, *20*(3), 399-408
- Roh, H. W., Hong, C. H., Lee, Y., Oh, B. H., Lee, K. S., Chang, K. J., . . . Son, S. J. (2015). Participation in physical, social, and religious activity and risk of depression in the elderly: A community-based three-year longitudinal study in Korea. *PLoS ONE*, *10* (7) (no pagination)(e0132838)
- Sanchez-Villegas, A., Ara, I., Guillen-Grima, F., Bes-Rastrollo, M., Varo-Cenarruzabeitia, J. J., & Martinez-Gonzalez, M. A. (2008). Physical activity, sedentary index, and mental disorders in the sun cohort study. *Medicine and Science in Sports and Exercise*, *40*(5), 827-834
- Sanchez-Villegas, A., Ruiz-Canela, M., Gea, A., Lahortiga, F., & Martinez-Gonzalez, M. A. (2016). The association between the Mediterranean lifestyle and depression. *Clinical Psychological Science*, *4*(6), 1085-1093
- Smith, T. L., Masaki, K. H., Fong, K., Abbott, R. D., Ross, G. W., Petrovitch, H., . . . White, L. R. (2010). Effect of walking distance on 8-year incident depressive symptoms in elderly men with and without chronic disease: the Honolulu-Asia Aging Study. *J Am Geriatr Soc*, *58*(8), 1447-1452. doi: 10.1111/j.1532-5415.2010.02981.x
- Strawbridge, W. J., Deleger, S., Roberts, R. E., & Kaplan, G. A. (2002). Physical activity reduces the risk of subsequent depression for older adults. *Am J Epidemiol*, *156*(4), 328-334
- Ströhle, A., Höfler, M., Pfister, H., Müller, A.-G., Hoyer, J., Wittchen, H.-U., & Lieb, R. (2007). Physical activity and prevalence and incidence of mental disorders in adolescents and young adults. *Psychological medicine*, *37*(11), 1657
- ten Have, M., de Graaf, R., & Monshouwer, K. (2011). Physical exercise in adults and mental health status: Findings from the Netherlands Mental Health Survey and Incidence Study (NEMESIS). *Journal of Psychosomatic Research*, *71*(5), 342-348. doi: <https://doi.org/10.1016/j.jpsychores.2011.04.001>
- Tsai, A. C., Chi, S. H., & Wang, J. Y. (2013). Cross-sectional and longitudinal associations of lifestyle factors with depressive symptoms in >=53-year old Taiwanese - Results of an 8-year cohort study. *Preventive Medicine*, *57*(2), 92-97
- Tsutsumimoto, K., Makizako, H., Hotta, R., Nakakubo, S., Shimada, H., & Suzuki, T. (2017). Prospective associations between sedentary behaviour and incident depressive symptoms in older people: a 15-month longitudinal cohort study. *International journal of geriatric psychiatry*, *32*(2), 193-200

- Veronese, N., Solmi, M., Maggi, S., Noale, M., Sergi, G., Manzato, E., . . . Stubbs, B. (2017). Frailty and incident depression in community-dwelling older people: Results from the elsa study. *International Journal of Geriatric Psychiatry*(Pagination), No Pagination Specified
- Wang, F., DesMeules, M., Luo, W., Dai, S., Lagace, C., & Morrison, H. (2011). Leisure-time physical activity and marital status in relation to depression between men and women: A prospective study. *Health Psychol, 30*(2), 204-211. doi: 10.1037/a0022434
- Weyerer, S. (1992). Physical inactivity and depression in the community. Evidence from the Upper Bavarian Field Study. *Int J Sports Med, 13*(6), 492-496. doi: 10.1055/s-2007-1021304
- Wise, L. A., Adams-Campbell, L. L., Palmer, J. R., & Rosenberg, L. (2006). Leisure time physical activity in relation to depressive symptoms in the Black Women's Health Study. *Ann Behav Med, 32*(1), 68-76. doi: 10.1207/s15324796abm3201\_8
- Yoshida, Y., Iwasa, H., Kumagai, S., Suzuki, T., Awata, S., & Yoshida, H. (2015). Longitudinal association between habitual physical activity and depressive symptoms in older people. *Psychiatry Clin Neurosci, 69*(11), 686-692. doi: 10.1111/pcn.12324

**FIGURE S1. PRISMA Flowchart of Study Selection**

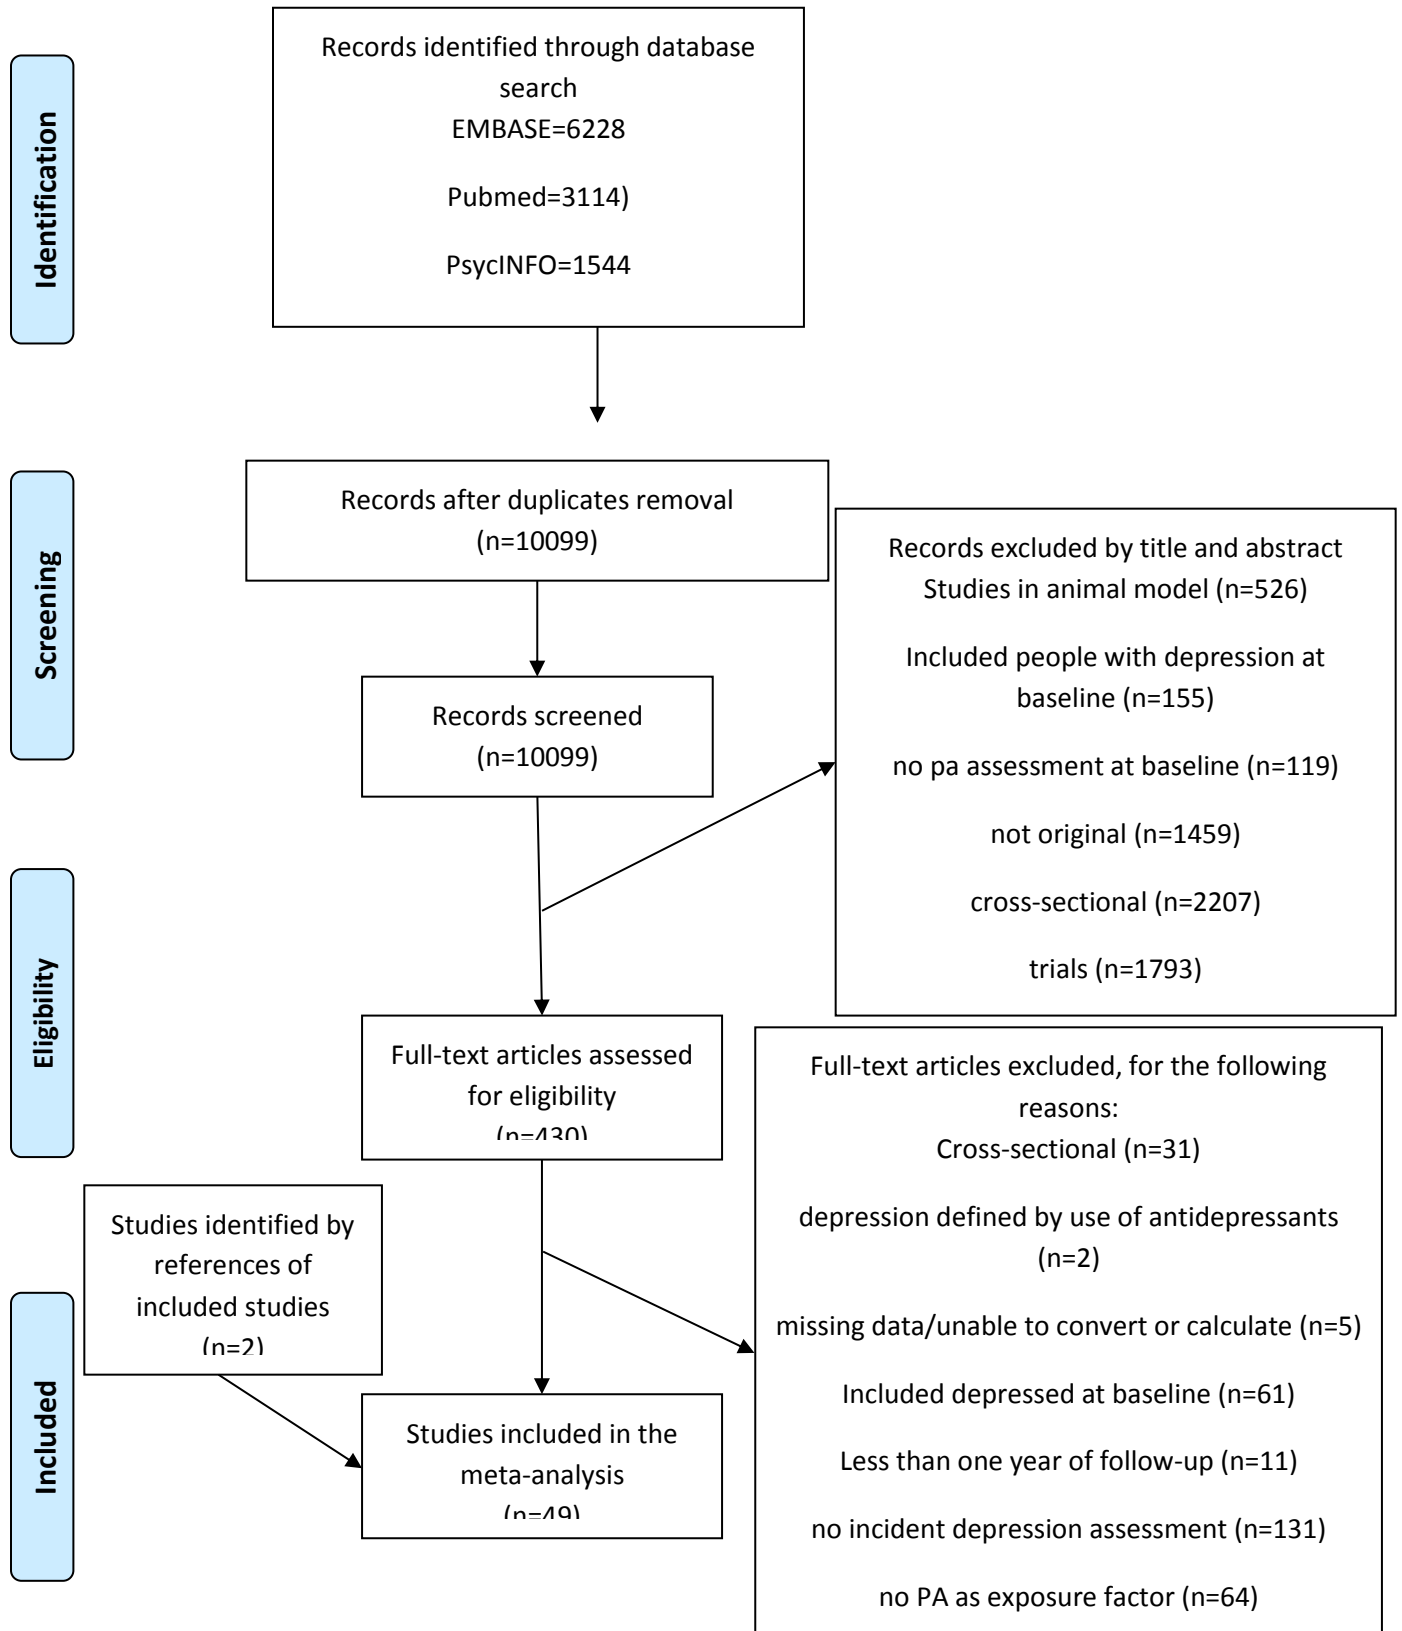



**FIGURE S2. Forest Plot of Studies Examining the Association of PA and Incident Depression.**

Effect size estimates are reported as crude odds ratios (ORs) and 95% confidence intervals (CI). Random-effects modeling was employed. Size of squares are proportional to sample size of individual studies, and diamond represents the summary effect size estimate.

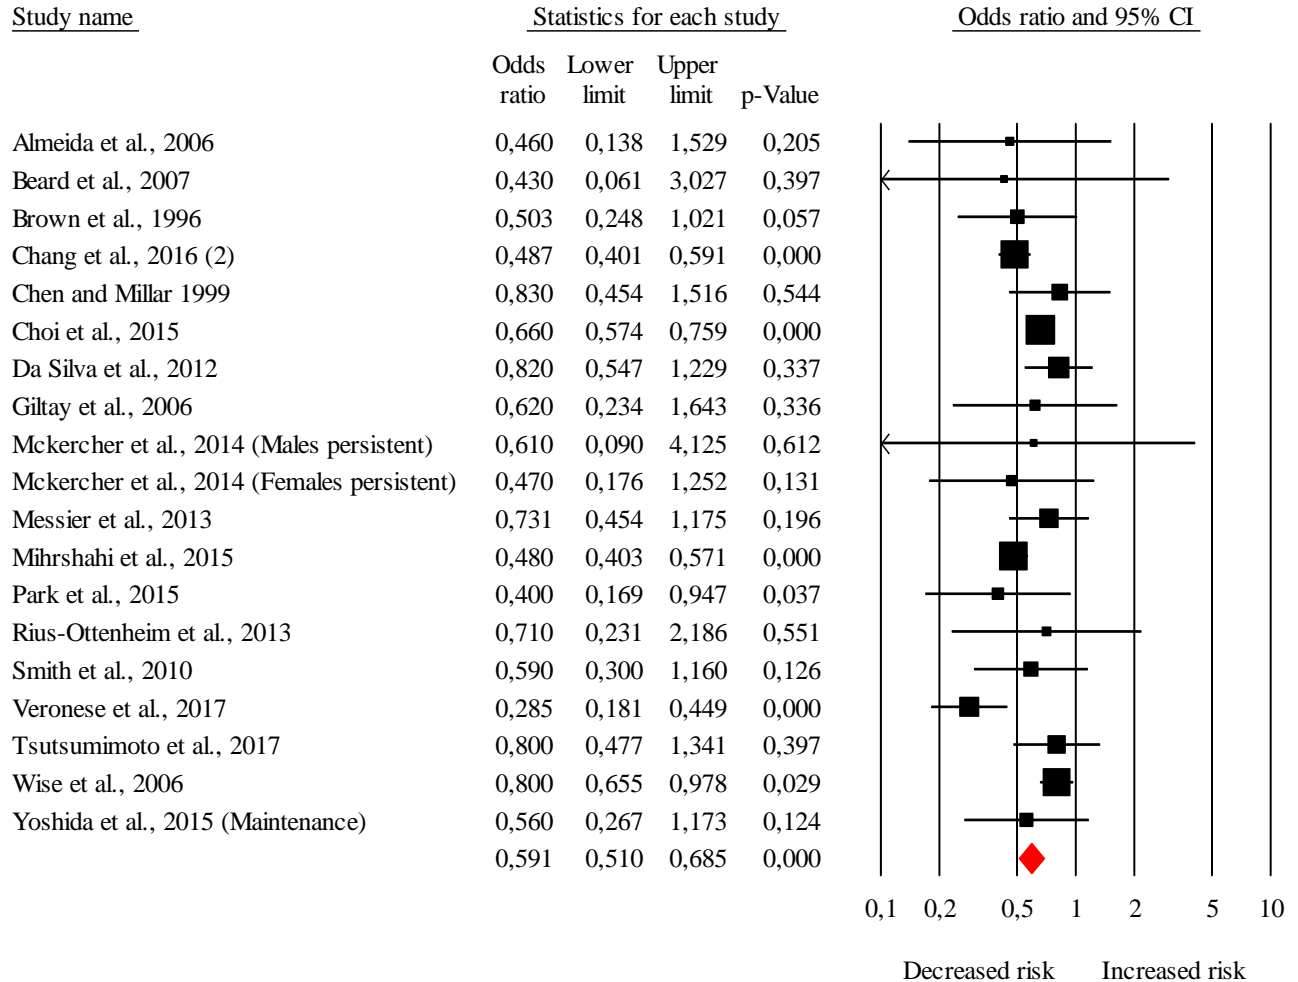

**FIGURE S3. Forest Plot of Studies Examining the Association of PA and Incident Depression.**

Effect size estimates are reported as adjusted relative risks (ARRs) and 95% confidence intervals (CI). Random-effects modeling was employed. Size of squares are proportional to sample size of individual studies, and diamond represents the summary effect size estimate.

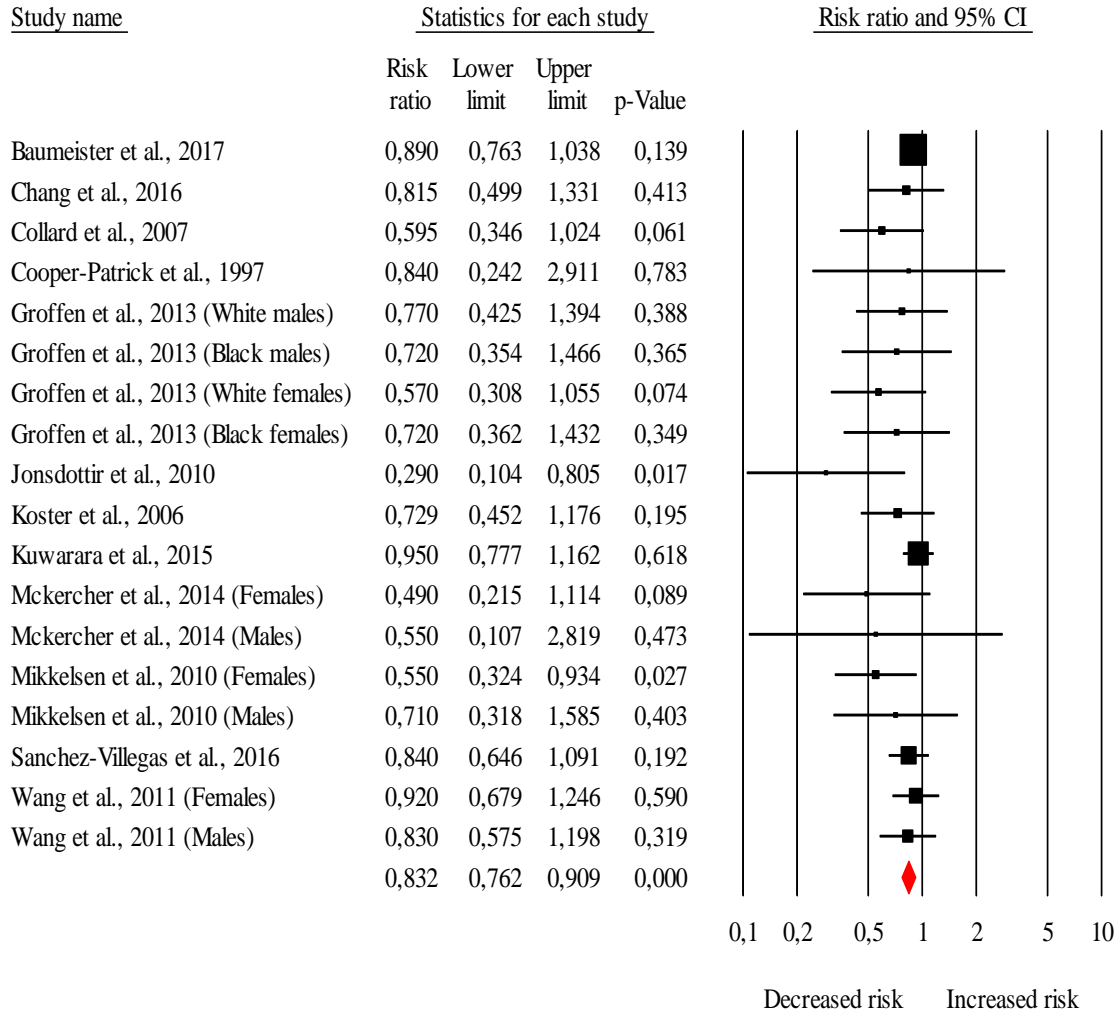

**FIGURE S4. Forest Plot of Studies Examining the Association of PA and Incident Depression.**

Effect size estimates are reported as crude relative risks (RRs) and 95% confidence intervals (CI). Random-effects modeling was employed. Size of squares are proportional to sample size of individual studies, and diamond represents the summary effect size estimate.

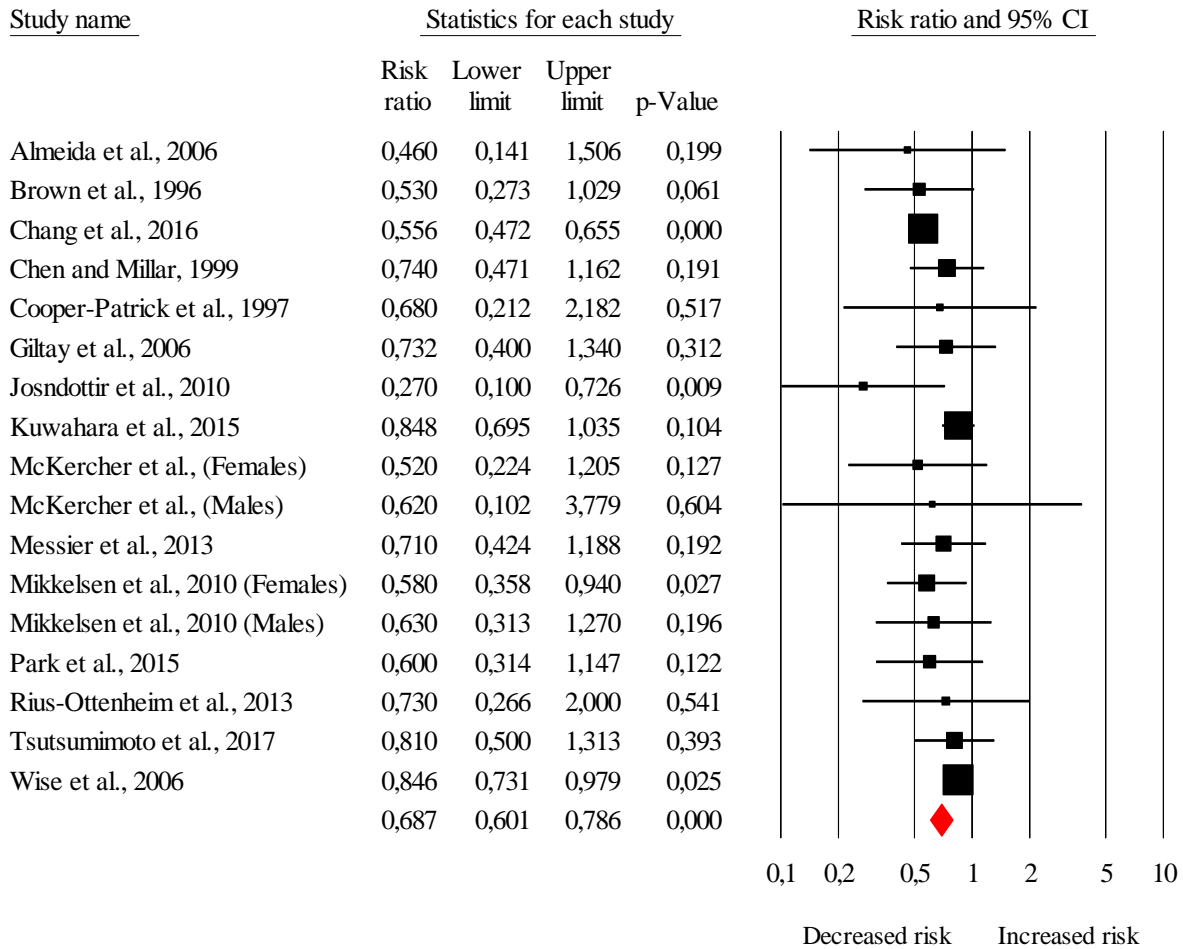

**TABLE S1. Study Quality Assessment**

| Study/item                     | Rep. of the exposed cohort | Selection of the non exposed cohort | Ascertainment of exposure | Demonstration that outcome of interest was not present at start of study | Comparability of cohorts on the basis of the design or analysis | Assessment of outcome | Was follow-up long enough for outcomes to occur | Adequacy of follow up of cohorts | total |
|--------------------------------|----------------------------|-------------------------------------|---------------------------|--------------------------------------------------------------------------|-----------------------------------------------------------------|-----------------------|-------------------------------------------------|----------------------------------|-------|
| Almeida et al., 2006           | A (+1*)                    | A (+1*)                             | C (0)                     | A (+1*)                                                                  | C (0)                                                           | C (0)                 | A (+1*)                                         | C (0)                            | 4     |
| Augestad et al., 2008          | B (+1*)                    | A (+1*)                             | C (0)                     | A (+1*)                                                                  | A (+2**)                                                        | C (0)                 | A (+1*)                                         | D (0)                            | 6     |
| Baumeister et al., 2017        | A (+1*)                    | A (+1*)                             | C (0)                     | A (+1*)                                                                  | A (+2**)                                                        | C (0)                 | A (+1*)                                         | D (0)                            | 6     |
| Beard et al., 2007             | B (+1*)                    | A (+1*)                             | C (0)                     | A (+1*)                                                                  | C (0)                                                           | B (+1*)               | A (+1*)                                         | B (+1*)                          | 6     |
| Brown et al., 1996             | B (+1*)                    | A (+1*)                             | C (0)                     | A (+1*)                                                                  | C (0)                                                           | C (0)                 | A (+1*)                                         | B (+1*)                          | 5     |
| Cabello et al., 2017           | A (+1*)                    | A (+1*)                             | C (0)                     | A (+1*)                                                                  | A (+2**)                                                        | C (0)                 | A (+1*)                                         | B (+1*)                          | 7     |
| Chang et al., 2016             | A (+1*)                    | A (+1*)                             | C (0)                     | A (+1*)                                                                  | A (+2**)                                                        | C (0)                 | A (+1*)                                         | C (0)                            | 6     |
| Chang et al., 2016 (2)         | C (0)                      | A (+1*)                             | C (0)                     | A (+1*)                                                                  | A (+2**)                                                        | C (0)                 | A (+1)                                          | B (+1*)                          | 6     |
| Chen et al., 1999              | A (+1*)                    | A (+1*)                             | C (0)                     | A (+1*)                                                                  | C (0)                                                           | C (0)                 | A (+1*)                                         | B (+1*)                          | 5     |
| Choi et al., 2015              | A (+1*)                    | A (+1*)                             | C (0)                     | A (+1*)                                                                  | A (+2**)                                                        | C (0)                 | A (+1*)                                         | B (+1*)                          | 7     |
| Clark et al., 2007             | A (+1*)                    | A (+1*)                             | C (0)                     | A (+1*)                                                                  | A (+2**)                                                        | C (0)                 | A (+1*)                                         | B (+1*)                          | 7     |
| Collard et al., 2015           | B (+1*)                    | A (+1*)                             | C (0)                     | A (+1*)                                                                  | A (+2**)                                                        | C (0)                 | A (+1*)                                         | B (+1*)                          | 7     |
| Cooper-Patrick et al., 1997    | B (+1*)                    | A (+1*)                             | C (0)                     | A (+1*)                                                                  | A (+2**)                                                        | C (0)                 | A (+1*)                                         | B (+1*)                          | 7     |
| Da Silva et al., 2012          | A (+1*)                    | A (+1*)                             | C (0)                     | A (+1*)                                                                  | A (+2**)                                                        | C (0)                 | A (+1*)                                         | B (+1*)                          | 7     |
| España-Romero et al., 2013     | A (+1*)                    | A (+1*)                             | C (0)                     | A (+1*)                                                                  | A (+2**)                                                        | C (0)                 | A (+1*)                                         | D (0)                            | 6     |
| Farmer et al., 1988            | B (+1*)                    | A (+1*)                             | C (0)                     | A (+1*)                                                                  | C (0)                                                           | C (0)                 | A (+1*)                                         | B (+1*)                          | 5     |
| Gallegos-Carrillo et al., 2013 | B (+1*)                    | A (+1*)                             | C (0)                     | A (+1*)                                                                  | A (+2**)                                                        | C (0)                 | A (+1*)                                         | B (+1*)                          | 7     |
| Garcia-Pena et al., 2013       | B (+1*)                    | A (+1*)                             | C (0)                     | A (+1*)                                                                  | A (+2**)                                                        | C (0)                 | A (+1*)                                         | B (+1*)                          | 7     |
| Giltay et al., 2007            | B (+1*)                    | A (+1*)                             | C (0)                     | A (+1*)                                                                  | C (0)                                                           | C (0)                 | A (+1*)                                         | B (+1*)                          | 5     |
| Groffen et al., 2013           | B (+1*)                    | A (+1*)                             | C (0)                     | A (+1*)                                                                  | A (+2**)                                                        | C (0)                 | A (+1*)                                         | B (+1*)                          | 7     |
| Hiles et al., 2015             | A (+1*)                    | A (+1*)                             | A (+1*)                   | A (+1*)                                                                  | A (+2**)                                                        | C (0)                 | A (+1*)                                         | C (0)                            | 7     |
| Jerstad et al., 2010           | A (+1*)                    | A (+1*)                             | C (0)                     | A (+1*)                                                                  | A (+2**)                                                        | C (0)                 | A (+1*)                                         | B (+1*)                          | 7     |
| Jonsdottir et al., 2010        | B (+1*)                    | A (+1*)                             | C (0)                     | A (+1*)                                                                  | A (+2**)                                                        | C (0)                 | A (+1*)                                         | B (+1*)                          | 7     |

|                               |         |         |       |         |          |         |         |         |   |
|-------------------------------|---------|---------|-------|---------|----------|---------|---------|---------|---|
| Joshi et al., 2016            | A (+1*) | A (+1*) | C (0) | A (+1*) | A (+2**) | C (0)   | A (+1*) | C (0)   | 6 |
| Koster et al., 2006           | B (+1*) | A (+1*) | C (0) | A (+1*) | A (+2**) | C (0)   | A (+1*) | C (0)   | 6 |
| Ku et al., 2009               | B (+1*) | A (+1*) | C (0) | A (+1*) | A (+2**) | C (0)   | A (+1*) | B (+1*) | 7 |
| Kuwahara et al., 2015         | A (+1*) | A (+1*) | C (0) | A (+1*) | A (+2**) | C (0)   | A (+1*) | B (+1*) | 6 |
| Mckercher et al., 2014        | A (+1*) | A (+1*) | C (0) | A (+1*) | C (0)    | C (0)   | A (+1*) | B (+1*) | 5 |
| Messier et al., 2013          | B (+1*) | A (+1*) | C (0) | A (+1*) | A (+2**) | C (0)   | A (+1*) | B (+1*) | 7 |
| Mihrshahi et al., 2015        | A (+1*) | A (+1*) | C (0) | A (+1*) | A (+2**) | C (0)   | A (+1*) | B (+1*) | 7 |
| Mikkelsen et al., 2010        | A (+1*) | A (+1*) | C (0) | A (+1*) | A (+2**) | A (+1*) | A (+1*) | B (+1*) | 8 |
| Mobily et al., 1996           | B (+1*) | A (+1*) | C (0) | A (+1*) | A (+2**) | C (0)   | A (+1*) | C (0)   | 6 |
| Park et al., 2015             | B (+1*) | A (+1*) | C (0) | A (+1*) | A (+2**) | C (0)   | A (+1*) | C (0)   | 6 |
| Pasco et al., 2011            | B (+1*) | A (+1*) | C (0) | A (+1*) | A (+2**) | A (+1*) | A (+1*) | C (0)   | 7 |
| Rius-Ottenheim et al., 2013   | C (0)   | A (+1*) | C (0) | A (+1*) | A (+2**) | C (0)   | A (+1*) | B (+1*) | 6 |
| Roh et al., 2015              | B (+1*) | A (+1*) | C (0) | A (+1*) | A (+2**) | C (0)   | A (+1*) | C (0)   | 7 |
| Sanchez-Villegas et al., 2008 | C (0)   | A (+1*) | C (0) | A (+1*) | A (+2**) | C (0)   | A (+1*) | B (+1*) | 6 |
| Sanchez-Villegas et al., 2016 | C (0)   | A (+1*) | C (0) | A (+1*) | A (+2**) | C (0)   | A (+1*) | B (+1*) | 6 |
| Smith et al., 2010            | A (+1*) | A (+1*) | C (0) | A (+1*) | A (+2**) | C (0)   | A (+1*) | C (0)   | 6 |
| Strawbridge et al., 2002      | A (+1*) | A (+1*) | C (0) | A (+1*) | A (+2**) | C (0)   | A (+1*) | B (+1*) | 7 |
| Strohle et al., 2007          | A (+1*) | A (+1*) | C (0) | A (+1*) | B (+1*)  | A (+1*) | A (+1*) | B (+1*) | 7 |
| Ten Have et al., 2011         | A (+1*) | A (+1*) | C (0) | A (+1*) | A (+2**) | C (0)   | A (+1*) | B (+1*) | 7 |
| Tsai et al., 2013             | A (+1*) | A (+1*) | C (0) | A (+1*) | A (+2**) | C (0)   | A (+1*) | B (+1*) | 7 |
| Tsutsumimoto et al., 2017     | B (+1*) | A (+1*) | C (0) | A (+1*) | C (0)    | C (0)   | A (+1*) | B (+1*) | 5 |
| Veronese et al., 2017         | A (+1*) | A (+1*) | C (0) | A (+1*) | A (+2**) | C (0)   | A (+1*) | B (+1*) | 7 |
| Wang et al., 2011             | A (+1*) | A (+1*) | C (0) | A (+1*) | A (+2**) | A (+1*) | A (+1*) | B (+1*) | 8 |
| Weyerer et al., 1992          | A (+1*) | A (+1*) | C (0) | A (+1*) | A (+2**) | A (+1*) | A (+1*) | B (+1*) | 8 |
| Wise et al., 2006             | C (0)   | A (+1*) | C (0) | A (+1*) | A (+2**) | C (0)   | A (+1*) | B (+1*) | 5 |
| Yoshida et al., 2015          | B (+1*) | A (+1*) | C (0) | A (+1*) | A (+2**) | C (0)   | A (+1*) | B (+1*) | 7 |

Key: The scoring of each item to the total of the study quality assessment is represented between each parenthesis. For the item "adequacy of follow up of cohorts", the criteria for scoring "C" (0) was a lost to follow up of 30% of the participants of the cohort.

**TABLE S2. Covariates Used in Each Study**

| Study                          | Covariates                                                                                                                                                                                                                                                                                                                   |
|--------------------------------|------------------------------------------------------------------------------------------------------------------------------------------------------------------------------------------------------------------------------------------------------------------------------------------------------------------------------|
| Almeida et al., 2006           | none                                                                                                                                                                                                                                                                                                                         |
| Augestad et al., 2008          | age, BMI, education, smoking, alcohol consumption and living arrangements                                                                                                                                                                                                                                                    |
| Baumeister et al., 2017        | age, sex, years of schooling, alcohol consumption, smoking and waist circumference                                                                                                                                                                                                                                           |
| Beard et al., 2007             | none                                                                                                                                                                                                                                                                                                                         |
| Brown et al., 1996             | none                                                                                                                                                                                                                                                                                                                         |
| Cabello et al., 2017           | demographics, presence of a physical chronic condition, BMI, general health, status and country<br>age, sex, education, BMI, systolic blood pressure, current smoking, cholesterol, coronary event, never smoked, and self-reported stroke, antidepressant medication use, memory, executive function and cognitive function |
| Chang et al., 2016             | none                                                                                                                                                                                                                                                                                                                         |
| Chang et al., 2016             | none                                                                                                                                                                                                                                                                                                                         |
| Chen et al., 1999              | age                                                                                                                                                                                                                                                                                                                          |
| Choi et al., 2014              | age, sex, educational level, marital status, household income, religion, region, employment status, the number of chronic disease, regular exercise and year                                                                                                                                                                 |
| Clark et al., 2007             | age, gender, gender*age, ethnicity, eligibility for free school meals, general health status, long-standing illness, overweight, health-risk behaviours                                                                                                                                                                      |
| Collard et al., 2015           | age, gender, level of education, smoking status, alcohol use, number of somatic diseases, cognition                                                                                                                                                                                                                          |
| Cooper-Patrick et al., 1997    | gender, age, smoking status, and substance abuse prior to depression.<br>sex, age, ethnicity, marital status, occupational position, stressful life events, satisfaction with work, alcohol intake, smoking status and self-reported respiratory disease                                                                     |
| Da Silva et al., 2012          | age, sex, baseline examination year, survey response year and alcohol consumption                                                                                                                                                                                                                                            |
| España-Romero et al., 2013     | age, sex, PA at baseline, education level, marital status, BMI, tobacco use, health problems in the last 6 months, number of chronic diseases, mobility problems, self-reported health status                                                                                                                                |
| Farmer et al., 1988            | age, race, education, employment status, self-reported health, household income, and length of follow-up                                                                                                                                                                                                                     |
| Gallegos-Carrillo et al., 2012 | age, sex, PA at baseline, education level, marital status, BMI, tobacco use, health problems in the last 6 months, number of chronic diseases, mobility problems, self-reported health status                                                                                                                                |
| Garcia-Pena et al., 2013       | unclear                                                                                                                                                                                                                                                                                                                      |
| Giltay et al., 2006            | none                                                                                                                                                                                                                                                                                                                         |
| Groffen et al., 2013           | age, site, marital status, and prevalent disease                                                                                                                                                                                                                                                                             |
| Hiles et al., 2015             | unclear                                                                                                                                                                                                                                                                                                                      |
| Jerstad et al., 2010           | baseline depression, body satisfaction, bulimic symptoms, social support, and previous year body mass index percentile                                                                                                                                                                                                       |
| Jonsdottir et al., 2010        | age, gender, body mass index, and educational level                                                                                                                                                                                                                                                                          |
| Joshi et al., 2016             | age, sex, race, income, and education                                                                                                                                                                                                                                                                                        |
| Koster et al., 2006            | age and sex<br>age, gender, educational level, marital status, living status, satisfaction with social support, satisfaction with income, drinking alcohol, activities of daily living and number of chronic diseases                                                                                                        |
| Ku et al., 2008                | age, gender, educational level, marital status, living status, satisfaction with social support, satisfaction with income, drinking alcohol, activities of daily living and number of chronic diseases                                                                                                                       |

|                               |                                                                                                                                                                                                                                                                                                                                              |
|-------------------------------|----------------------------------------------------------------------------------------------------------------------------------------------------------------------------------------------------------------------------------------------------------------------------------------------------------------------------------------------|
| Kuwahara et al., 2015         | age, sex, BMI, smoking, alcohol consumption, shift work, overtime work, job position, marital status, mutual relations and baseline depression scores                                                                                                                                                                                        |
| Messier et al., 2013          | sex, age, education and marital status                                                                                                                                                                                                                                                                                                       |
| Mckercher et al., 2014        | Age, self-reported health status, language spoken at home in childhood, number of live births, current occupation, and depressed mood                                                                                                                                                                                                        |
| Mikkelsen et al., 2010        | age, income, smoking, education, alcohol intake, BMI, occupational physical activity and chronic disease                                                                                                                                                                                                                                     |
| Mirshahi et al., 2015         | education, marital status, BMI, physical activity, alcohol intake, fish and energy intake and comorbidities.                                                                                                                                                                                                                                 |
| Mobily et al., 1996           | age, marital status, smoking status at baseline, history of arthritis, hip fracture, stroke, cardiovascular disease, or emphysema at baseline and incidence of stroke, arthritis, cardiovascular disease, and emphysema between baseline and the 3-year follow-up                                                                            |
| Park et al., 2015             | age, sex, years of education, marital status, living arrangement, medical insurance, and employment                                                                                                                                                                                                                                          |
| Pasco et al., 2011            | Age, anthropometry, smoking, alcohol use and SES                                                                                                                                                                                                                                                                                             |
| Rius-Ottenheim et al., 2013   | age, sex, education, marital status, smoking habits, alcohol use, diabetes mellitus, stroke, time since myocardial infarction, BMI, self-rated health, treatment group and cognition                                                                                                                                                         |
| Roh et al., 2015              | age, gender, education, household income, smoking, alcohol intake, number of diseases, K-IADL score, cognition score and SGDS-K                                                                                                                                                                                                              |
| Sanchez-Villegas et al., 2008 | gender, age, employment status, body mass index, marital status, smoking, presence of any severe disease at baseline, alcohol intake and total energy intake                                                                                                                                                                                 |
| Sanchez-Villegas et al., 2016 | age and sex, BMI, smoking, use of vitamin supplements, total energy intake, presence of cardiovascular disease, type 2 diabetes, hypertension, and dyslipidaemia at baseline, adherence to the Mediterranean diet, and socializing activities                                                                                                |
| Smith et al., 2010            | age, education, marital status, BMI, hypertension, diabetes mellitus, alcohol use, smoking status, prevalent coronary heart disease, stroke, cancer, Parkinson's disease, dementia, cognitive impairment, functional impairment, 8-year incident dementia or cognitive impairment                                                            |
| Strohle et al., 2007          | age and gender                                                                                                                                                                                                                                                                                                                               |
| Strawbrigde et al., 2001      | age, sex, ethnicity, education, financial problems, neighborhood, disability, chronic conditions, health behaviors, and the social relation variables                                                                                                                                                                                        |
| Ten Have et al., 2011         | gender, age, education, partner status, employment status, and presence of a somatic illness                                                                                                                                                                                                                                                 |
| Tsai et al., 2013             | sex, age, level of education, psychological stress, diabetes, heart disease, IADL status, family support, and audio acuity                                                                                                                                                                                                                   |
| Tsutsumimoto et al., 2016     | Age and sex                                                                                                                                                                                                                                                                                                                                  |
| Veronese et al., 2017         | age, gender, educational level, marital status, smoking habits, activities of daily living score, number of diseases at baseline, Center for Epidemiologic Studies Depression Scale (CES-D) score, and immediate word recall, delayed word recall, orientation in time, verbal fluency and recall summary score at baseline and at follow-up |
| Wang et al., 2011             | age, BMI, marital status, working status, income, chronic diseases, social support, long-term disabilities or handicaps, restriction of activity, activity prevented due to pain, and self-rated health                                                                                                                                      |
| Weyerer et al., 1992          | sex, age, social class and physical disorder                                                                                                                                                                                                                                                                                                 |
| Wise et al., 2006             | age, education, occupation, marital status, geographic region, physical activity, BMI, preexisting health conditions, energy intake, smoking, current alcohol consumption, and child care responsibilities                                                                                                                                   |
| Yoshida et al., 2015          | sex, age, educational status, smoking status, alcohol consumption, outpatient visits, and higher-level competence                                                                                                                                                                                                                            |

**TABLE S3. Incidence and Dropout Rates**

|                                | exposed | non-exposed | %dropout |
|--------------------------------|---------|-------------|----------|
| Almeida et al., 2006           | 15.1%   | 26.4%       | unclear  |
| Augestad et al., 2008          | ?       | ?           | unclear  |
| Baumeister et al., 2017        | ?       | ?           | unclear  |
| Beard et al., et al., 2007     | ?       | ?           | 31.0     |
| Brown et al., 1996             | 6.0%    | 14.3%       | 36       |
| Cabello et al., 2017           | ?       | ?           | unclear  |
| Chang et al., 2016             | 3.2%    | 6.1%        | 70       |
| Chang et al., 2016             | 13.8%   | 24.7%       | unclear  |
| Chen and Millar 1999           | 3.6%    | 4.8%        | 6.4      |
| Choi et al., 2015              | ?       | ?           | 52       |
| Clark et al., 2007             | ?       | 44.5%       | 25       |
| Collard et al., 2015           | ?       | ?           | 33.2     |
| Cooper-Patrick et al., 1997    | ?       | ?           | 17       |
| Da Silva et al., 2012          | ?       | ?           | 20       |
| España-Romero et al., 2013     | ?       | ?           | unclear  |
| Farmer et al., 1988            | ?       | ?           | 21.8     |
| Gallegos-Carrillo et al., 2013 | 10.6%   | 16.5%       | unclear  |
| García-Peña et al., 2013       | ?       | ?           | 29.42    |
| Giltay et al., 2006            | 30.3%   | 41.2%       | unclear  |
| Groffen et al., 2013           | ?       | ?           | 12.4     |
| Hiles et al., 2015             | ?       | ?           | 30       |
| Jerstad et al., 2010           | ?       | ?           | unclear  |
| Jonsdottir et al., 2010        | ?       | ?           | 15       |
| Joshi et al., 2016             | ?       | ?           | 33       |
| Koster et al., 2006            | ?       | ?           | 19.2     |
| Ku et al., 2009                | ?       | ?           | 18.8     |



|                               |                            |                               |         |
|-------------------------------|----------------------------|-------------------------------|---------|
| Kuwahara et al., 2015         | ?                          | ?                             | unclear |
| Mckercher et al., 2014        | 9% females / 3.6%<br>males | 14.9% females / 9.5%<br>males | 39      |
| Messier et al., 2013          | 12.5%                      | 16.9%                         | 34      |
| Mihrshahi et al., 2015        | ?                          | ?                             | 41      |
| Mikkelsen et al., 2010        | ?                          | ?                             | 11.7    |
| Mobily et al., 1996           | ?                          | ?                             | 43.3    |
| Park et al., 2015             | 23.8%                      | 58.4%                         | 54.7    |
| Pasco et al., 2011            | ?                          | ?                             | 39      |
| Rius-Ottenheim et al., 2013   | 8.4%                       | 11.3%                         | 21.5    |
| Roh et al., 2015              | ?                          | ?                             | 33.3    |
| Sanchez-Villegas et al., 2008 | ?                          | ?                             | 10      |
| Sanchez-Villegas et al., 2016 | ?                          | ?                             | 10      |
| Smith et al., 2010            | ?                          | ?                             | 59.5    |
| Strawbridge et al., 2002      | 1.7%                       | 7.7%                          | 9.8     |
| Strohle et al., 2007          | 7.4%                       | 10.6%                         | 15.7    |
| Ten Have et al., 2011         | ?                          | ?                             | 32.2    |
| Tsai et al., 2013             | 15.1%                      | 18.5%                         | 29.5    |
| Tsutsumimoto et al., 2017     | 7.3%                       | 9%                            | 13.2    |
| Veronese et al., 2017         |                            |                               | 10      |
| Wang et al., 2011             | ?                          | ?                             | 22.6    |
| Weyerer et al., 1992          | 2.6%                       | 3.4%                          | 12.7    |
| Wise et al., 2006             | 25%                        | 29.5%                         | 13      |
| Yoshida et al., 2015          | ?                          | ?                             | 28.4    |
