# Supplementary material for: Physical Activity and Incident Depression: A Meta-Analysis of Prospective Cohort Studies
Source: Atypon-hosted journal article supplement (doi:10.1176/appi.ajp.2018.17111194), 2018-04-25
Supplement: correction.pdf [file correction.pdf]

## Correction

When the article “Physical Activity and Incident Depression: A Meta-Analysis of Prospective Cohort Studies,” by Felipe B. Schuch et al. (doi:10.1176/appi.ajp.2018.17111194) was published online on April 25, 2018, a few of the studies listed in Figure 1, in Table 1, and in the online supplement had years of publication in text that did not match the published citation, and a reference was duplicated. These errors were corrected and the references renumbered, and the article was reposted on May 3, 2018.
